# Novel Role for the Innate Immune Receptor Toll-Like Receptor 4 (TLR4) in the Regulation of the Wnt Signaling Pathway and Photoreceptor Apoptosis

Hyun Yi<sup>1</sup>, Amit K. Patel<sup>1</sup>, Chhinder P. Sodhi<sup>2</sup>, David J. Hackam<sup>2</sup>, Abigail S. Hackam<sup>1\*</sup>

**1** Bascom Palmer Eye Institute, University of Miami Miller School of Medicine, Miami, Florida, United States of America, **2** Department of Surgery (Pediatric), University of Pittsburgh, Pittsburgh, Pennsylvania, United States of America

## Abstract

Recent evidence has implicated innate immunity in regulating neuronal survival in the brain during stroke and other neurodegenerations. Photoreceptors are specialized light-detecting neurons in the retina that are essential for vision. In this study, we investigated the role of the innate immunity receptor TLR4 in photoreceptors. TLR4 activation by lipopolysaccharide (LPS) significantly reduced the survival of cultured mouse photoreceptors exposed to oxidative stress. With respect to mechanism, TLR4 suppressed Wnt signaling, decreased phosphorylation and activation of the Wnt receptor LRP6, and blocked the protective effect of the Wnt3a ligand. Paradoxically, TLR4 activation prior to oxidative injury protected photoreceptors, in a phenomenon known as preconditioning. Expression of TNF $\alpha$  and its receptors TNFR1 and TNFR2 decreased during preconditioning, and preconditioning was mimicked by TNF $\alpha$  antagonists, but was independent of Wnt signaling. Therefore, TLR4 is a novel regulator of photoreceptor survival that acts through the Wnt and TNF $\alpha$  pathways.

**Citation:** Yi H, Patel AK, Sodhi CP, Hackam DJ, Hackam AS (2012) Novel Role for the Innate Immune Receptor Toll-Like Receptor 4 (TLR4) in the Regulation of the Wnt Signaling Pathway and Photoreceptor Apoptosis. PLoS ONE 7(5): e36560. doi:10.1371/journal.pone.0036560

**Editor:** Mauricio Martins Rodrigues, Federal University of São Paulo, Brazil

**Received:** November 29, 2011; **Accepted:** April 7, 2012; **Published:** May 17, 2012

**Copyright:** © 2012 Yi et al. This is an open-access article distributed under the terms of the Creative Commons Attribution License, which permits unrestricted use, distribution, and reproduction in any medium, provided the original author and source are credited.

**Funding:** This study was supported by NEI RO1 EY017837, the Karl Kirchgessner Foundation and a Research to Prevent Blindness Special Scholar Award (ASH). Institutional support to Bascom Palmer Eye Institute was from a Research to Prevent Blindness Unrestricted Grant and NEI Center Core Grant P30EY014801. The funders had no role in study design, data collection and analysis, decision to publish, or preparation of the manuscript.

**Competing Interests:** The authors have declared that no competing interests exist.

\* E-mail: ahackam@med.miami.edu

## Introduction

Toll-like receptors (TLRs) are essential mediators of innate and adaptive immunity in the defence against invading pathogens. Accordingly, TLRs are highly expressed on immune cells that have pathogen surveillance activity [1,2]. However, the detection of TLRs on other cell types, such as neurons and glia, suggests additional physiological functions for TLRs. TLRs in the central nervous system (CNS) are activated by endogenous molecules released from injured cells that act as danger signals, known as damage-associated molecular patterns (DAMPs) [1,3,4,5]. TLR4 in particular is increasingly being recognized as a modulator of neuronal survival in the brain during non-pathogen (sterile) injuries [6]. TLR4 is upregulated in many neurodegenerative diseases and neuronal injuries [7,8] and also increases when neurons are exposed to toxic proteins and lipid peroxidation products [9]. Excessive activation of TLR4 and other TLRs induces expression of cytokines and pro-inflammatory molecules, resulting in further neuronal damage [10]. Indeed, induction of the TLR4 innate immunity pathway during oxidative and ischemic injuries promotes severe axonal and neuronal loss [9,11,12,13,14]. Furthermore, mice lacking TLR4 show reduced neuronal apoptosis and decreased pathology in the retina and brain [13,14], which lends further support for a pathologic role of TLR4 in neuronal injury.

Paradoxically, low levels of TLR4 activation are believed to be beneficial to the CNS, and lead to a mild immune response, interferon production and reduced neuronal death. For example,

low doses of LPS applied prior to CNS injury decreases neuronal damage during subsequent injury, in a phenomenon known as preconditioning [15,16]. Therefore, precise regulation of TLR activity plays an important, yet poorly understood, role in neuronal injury and survival.

The Wnt pathway is an essential signaling cascade that regulates numerous processes in embryonic and adult tissues, including cellular proliferation, survival and differentiation. Our group and others recently demonstrated that Wnt signaling is increased during neuronal injury in the retina and is neuroprotective to retinal neurons and cell lines [17,18,19,20,21]. However, endogenous regulators of Wnt signaling are unknown. Interestingly, TLR4 was recently reported to down-regulate the Wnt pathway in enterocytes in the ileum of newborn mice [22], raising the possibility that TLR4 may regulate Wnt signaling and thereby influence photoreceptor survival.

Photoreceptors are light-sensing cells in the retina, which is the thin, multi-layer tissue at the back of the eye that is essential for vision. In the present study, we investigated the consequences of TLR4 activation on photoreceptor survival and tested whether TLR4 modulates the neuroprotective property of Wnt signaling. In summary, our findings show that TLR4 reduced photoreceptor survival in the presence of oxidative stress. Additionally, TLR4 suppressed Wnt-dependent protection of photoreceptors, and decreased phosphorylation of the Wnt pathway mediator LRP6 but not GSK3 $\beta$ . Furthermore, TLR4 activation prior to oxidative stress protected photoreceptors, and this preconditioning effect

involved TNF $\alpha$  and was not dependent on Wnt signaling. Because damage and death of photoreceptors is a major cause of retinal degeneration diseases, our results implicate TLR4 in regulating photoreceptor death during retinal degeneration by interfering with the neuroprotective activity of Wnt signaling.

## Results

### TLR4 is Expressed in Muller Glia and Photoreceptors

Muller glia are the major radial glia type in the retina that provides trophic support to photoreceptors. Photoreceptor survival is influenced by proteins within the photoreceptors themselves as well as proteins secreted from adjacent Muller glia. We first examined whether TLR4 was expressed in these relevant cell types, using immunohistochemistry on dissociated Muller glia-photoreceptor co-cultures. The co-cultures are enriched (>99%) for Muller glia and photoreceptors, as previously described in [17], and offer the advantage of eliminating the contribution of other TLR4-responsive cells, such as microglia and astrocytes.

TLR4 was detected in both Muller glia and photoreceptors, as shown in Figure 1. Immunostaining for TLR4 overlapped with rhodopsin-positive photoreceptors and vimentin-positive Muller glia (Figure 1A). TLR4 expression in primary Muller glia culture and the Muller glia cell line MIO-M1 was confirmed by Western blotting (Figure 1B–C) and PCR (Figure 1D–E). The specificity of the anti-TLR4 antibody was indicated by the disappearance of the 100 kDa TLR4 band after preincubating the antibody with the peptide used to create the antisera (Figure 1C). Also, the TLR4 activator LPS induced a dose-dependent increase in the target gene IL6 in a Muller glia cell line, providing functional evidence of TLR4 activity in glia (Figure 1E).

To further confirm that TLR4 is functional in the Muller glia-photoreceptor primary co-cultures, we quantified nuclear localization of p65/RELA, a downstream target of TLR4 through the NF $\kappa$ B pathway. Upon TLR4 activation, the NF $\kappa$ B/p65 complex is liberated from its inhibitor in the cytoplasm and translocates into the nucleus where it activates transcription. Nuclear p65 is often used as a marker of TLR4 activity [23]. The function of TLR4 in response to LPS treatment was examined in the Muller glia because Muller glia are a primary source of growth factors in the retina and have been shown to increase photoreceptor viability during injury through Wnt signaling [17]. The Muller glia-photoreceptor cultures showed a significant increase in nuclear localized p65 in glutamine synthetase-positive Muller glia after treatment with LPS (Figure 2A–B,  $p < 0.001$ ,  $n = 5$ ). LPS also induced a dose-dependent increase in nuclear localization of p65 in the Muller glia cell line MIO-M1 (Figure 2C–D,  $p < 0.01$ ,  $n = 5$ ). These data demonstrate that the primary cultures are an appropriate *in vitro* model to investigate the role of TLR4 in photoreceptors and Muller glia in response to LPS stimulation.

### Activation of TLR4 Decreases Photoreceptor Survival

The expression of TLR4 in Muller glia and photoreceptors led us to ask what is its potential role in photoreceptor survival. The Muller glia-photoreceptor primary co-cultures were used to test the effect of TLR4 activation on photoreceptor viability. The co-cultures reflect the response of only the two cell types of interest, Muller glia and photoreceptors, and have been used previously to investigate mechanisms of photoreceptor survival in many studies, particularly when fewer cell types and absence of systemic factors are preferred [24,25]. The TLR4-responsive microglia cell type represents fewer than 0.005% of the cells in the culture, as detected by an antibody against the IBA-1 protein [17].

H<sub>2</sub>O<sub>2</sub>, a commonly used inducer of oxidative stress, was used to injure the photoreceptors. Oxidative stress was chosen because it is a key contributor to photoreceptor death *in vivo* [26]. Previous studies with this experimental design demonstrated that photoreceptors were susceptible to H<sub>2</sub>O<sub>2</sub> (99% of dead cells) and not Muller glia (1%), and showed that Wnt3a protected photoreceptors from H<sub>2</sub>O<sub>2</sub>-induced death [17]. Muller glia-photoreceptor co-cultures were incubated in 0.4 mM H<sub>2</sub>O<sub>2</sub> in the presence or absence of recombinant Wnt3a and LPS. The prototypic ligand LPS was used to activate TLR4 in these experiments because the endogenous activators of TLR4 in the retina are unknown. As shown in Figure 3A, LPS significantly reduced photoreceptor survival in the presence of H<sub>2</sub>O<sub>2</sub> whereas Wnt3a was protective ( $p < 0.05$  vs H<sub>2</sub>O<sub>2</sub> alone,  $n = 4$ ). Furthermore, the combination of LPS and Wnt3a with H<sub>2</sub>O<sub>2</sub> had lower survival than Wnt3a with H<sub>2</sub>O<sub>2</sub>, indicating that LPS reduced the protective effect of Wnt3a ( $p < 0.05$  vs Wnt3a,  $n = 4$ ). LPS is not toxic in the absence of H<sub>2</sub>O<sub>2</sub>, indicating a requirement for injury (see Figure 3C).

To confirm that LPS induced photoreceptor apoptosis, we quantified the number of cells in which we detected both active caspase 3 and the photoreceptor marker rhodopsin. Label overlap (\*) of rhodopsin-positive photoreceptors (green) with active caspase 3 (red) marks photoreceptors dying from H<sub>2</sub>O<sub>2</sub> (Figure 3B). No label overlap was observed with the Muller glia marker vimentin and active caspase 3, indicating resistance to H<sub>2</sub>O<sub>2</sub> (not shown). Quantification of overlap indicates that Wnt3a reduced the percent of activated caspase 3-positive photoreceptors consistent with the viability assay above (compare no additions vs. Wnt3a, Figure 3C) ( $p < 0.05$ ,  $n = 5$  for no additions and  $n = 4$  for Wnt3a). Furthermore, LPS prevented Wnt3a-mediated protection and increased the percent of caspase-positive photoreceptors (compare Wnt3a vs. 50  $\mu$ g/ml LPS+Wnt3a) (Figure 3C,  $p < 0.05$ ,  $n = 4$  for Wnt3a and  $n = 5$  for 50  $\mu$ g/ml LPS+Wnt3a). LPS did not increase the amount of caspase-positive photoreceptors in the absence of H<sub>2</sub>O<sub>2</sub> (Figure 3C).

Next, we investigated whether blocking endogenous TLR4 activity affects photoreceptor survival. LPS-RS is a potent antagonist of TLR4 that competes with LPS for binding to myeloid differentiation protein 2 (MD-2) [27], and the MyD88 homodimerization inhibitory peptide blocks TLR activity by acting as a decoy by binding to the MyD88 TIR domain. The Muller glia-photoreceptor cultures were injured by H<sub>2</sub>O<sub>2</sub> in the presence of LPS-RS or MyD88 inhibitor peptide, and photoreceptor survival was measured. LPS was not included in these experiments to allow testing of the effects of endogenous activation of TLR4 on photoreceptor viability. Both LPS-RS and the MyD88 inhibitor significantly increased survival (Figure 3D,  $p < 0.05$ ,  $n = 3$ ), indicating that blocking endogenous TLR4 activation protects against oxidative-stress induced cell death.

### Activation of TLR4 Decreases Neuroprotective Wnt Signaling

The viability results described above led us to investigate the relationship between TLR4 and Wnt signaling. Because Muller glia express both Wnt receptors and TLR4, and Wnt signaling protects photoreceptors against oxidative stress (Figure 3, [17]), we hypothesized that TLR4 activity contributes to photoreceptor death by suppressing the Wnt pathway in Muller glia during oxidative stress. To test the effect of TLR4 on Wnt signaling, Muller glia-photoreceptor co-cultures were cotreated with LPS and Wnt3a, or treated with Wnt3a alone. As shown in Fig. 4A, LPS resulted in a modest but significant decrease of Wnt signaling,

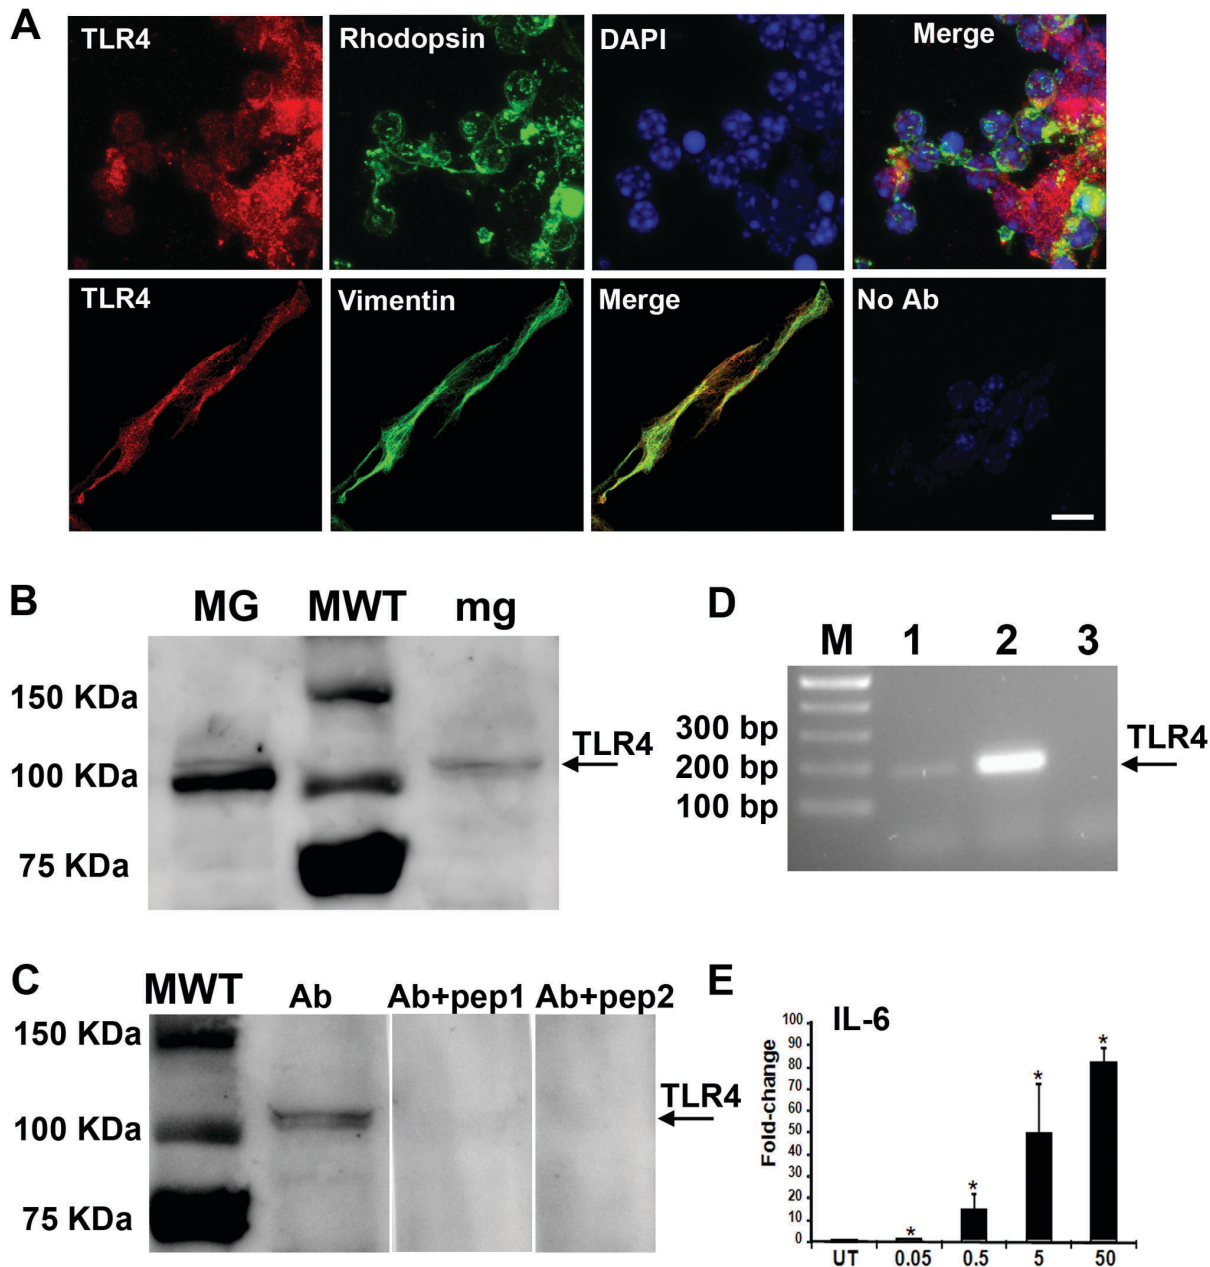

**Figure 1. Expression of TLR4 in primary Muller glia-photoreceptor co-cultures.** (A) TLR4 (red) is expressed in rhodopsin-positive photoreceptors (green). DAPI marks the nuclei. Detection of TLR4 and rhodopsin in the same photoreceptor cell is indicated by label overlap and is shown in the merged image. TLR4 (red) was also detected in vimentin-positive Muller glia (green). No antibody control indicates absence of non-specific immunostaining. Confocal microscopy, 63 $\times$ . Scale bar is 20  $\mu$ m. (B) Western blot showing detection of TLR4 protein (arrow) in whole cell lysates from the Muller glia cell line MIO-M1 (MG). The microglia cell line BV-2 was used as a positive control (mg). MWT, molecular weight marker, with sizes indicated on the left. (C) The specificity of the anti-TLR4 antibody was confirmed by preincubating with its peptide epitope. Detection of the TLR4 protein was evident with the antibody alone (Ab) but was mostly eliminated by 100  $\mu$ g of the peptide antigen (Ab+pep1), and entirely eliminated by 200  $\mu$ g (Ab+pep2). (D) TLR4 was detected by RT-PCR from primary cultures of Muller glia. Lane 1, diluted cDNA; lane 2, undiluted cDNA; lane 3, no template control. Lack of signal in the control indicates the specificity of the PCR reaction. (E) Dose-dependent induction of the TLR4 target gene IL-6 by LPS demonstrates that TLR4 is functional in the Muller glia cell line MIO-M1. IL-6 expression was measured by QPCR, and normalized to the house-keeping gene ARP. Mean  $\pm$  SD, \* $p$ <0.05,  $n$ =4, compared with untreated UT. doi:10.1371/journal.pone.0036560.g001

by 21% ( $p$ <0.05,  $n$ =3) in H<sub>2</sub>O<sub>2</sub>-injured Muller glia-photoreceptor co-cultures, as measured by Wnt signaling luciferase reporter assays.

Wnt3a increases Wnt signaling only in the Muller glia in the co-cultures because photoreceptors do not show active Wnt signaling pathways [17]. Therefore, a Muller glia cell line was used to

further explore the relationship between TLR4 and Wnt signaling. The MIO-M1 Muller glia cell line offers the advantage of higher transfection efficiencies and larger cell numbers than the primary cultures. Treatment of MIO-M1 cells with increasing concentrations of LPS (0.5–50  $\mu$ g/ml) resulted in dose-dependent suppression of Wnt3a-mediated Wnt signaling (Figure 4B,  $p$ <0.05,  $n$ =3).

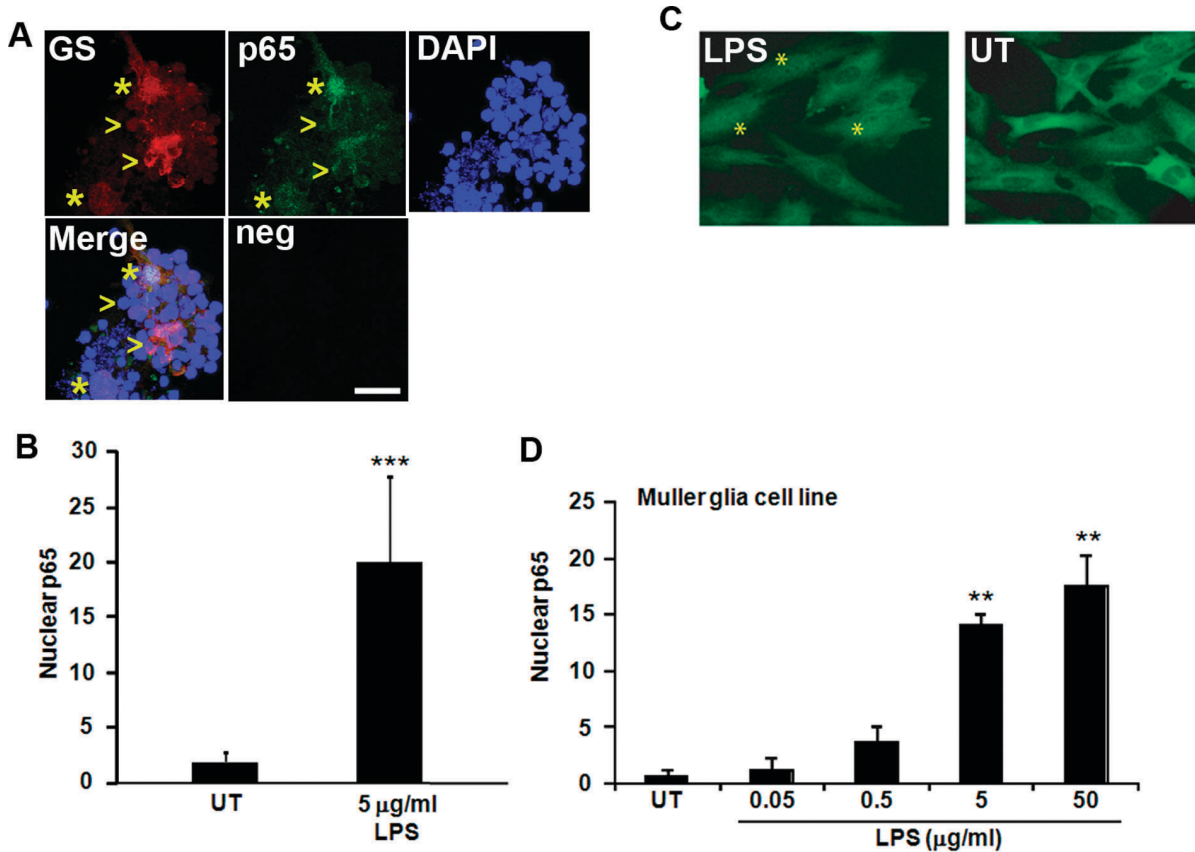

**Figure 2. TLR4 is functional in primary Muller glia-photoreceptor co-cultures and a Muller glia cell line.** (A) Nuclear translocation of the downstream TLR4 effector p65 was used as a marker of TLR4 activation. Muller glia-photoreceptor cultures treated with LPS (5 µg/ml) show nuclear localized p65 in Muller glia, as shown by p65 detection in the nuclei of cells costaining with the Muller glia marker glutamine synthetase (GS, asterisks). The arrowheads indicate GS-positive cells that contain cytoplasmic p65, indicating lack of TLR4 activation. Neg, immunostaining negative control. (B) Quantification of cells with p65 signal that overlapped with DAPI stained nuclei in glutamine synthetase-positive Muller glia. Mean ± SD, \*\*\*,  $p < 0.001$ ,  $n = 5$ . (C–D) MIO-M1 cells treated with LPS also show nuclear p65 (\*) compared with untreated cells (UT). Dose-dependent nuclear translocation of p65 by LPS, indicating TLR4 activation in the Muller glia cell line. Mean ± SD, \*\*,  $p < 0.01$ ,  $n = 5$ . Scale bar in (A) is 10 µm. doi:10.1371/journal.pone.0036560.g002

To confirm that TLR4 mediated the LPS-dependent suppression of Wnt signaling, the cultures were transfected with wild-type TLR4 or a functionally inactive dominant-negative TLR4 mutant (dnTLR4). The dnTLR4 gene contains the inhibitory P712H mutation, is unresponsive to LPS and blocks endogenous LPS/TLR4 signaling [28,29]. Transfection of dnTLR4 did not suppress Wnt signaling in the presence of LPS, and resulted in the same level of luciferase activity as the EGFP control gene (Figure 4C). In contrast, Wnt signaling was suppressed by wild-type TLR4 by 40% (Figure 4C,  $p < 0.05$ ,  $n = 5$ ). Expression of TLR4 without added LPS also led to decreased Wnt signaling, consistent with TLR4 over-expression activating its pathway without exogenous ligands and providing additional evidence that TLR4 inhibits Wnt signaling.

Quantitation of the TLR4 target gene IL6 confirmed that dnTLR4 was unresponsive to LPS, that wild-type TLR4 was stimulated by LPS, and that wild-type TLR4 could also function independently of LPS addition (Figure S1,  $p < 0.01$ ,  $n = 4$ ). Together, the data in Figures 3 and 4 suggest that the molecular basis for decreased viability of the Muller glia-photoreceptor primary cultures co-treated with LPS and Wnt3a is due to TLR4 decreasing Wnt signaling and reducing Wnt3a-mediated protection against  $H_2O_2$ .

### TLR4 Regulates the Wnt Pathway through LRP6

We next examined the mechanism by which TLR4 reduced Wnt3a-induced signaling. In the canonical Wnt pathway, Wnt ligands bind to Frizzled and LRP5/6 co-receptors at the plasma membrane, leading to recruitment of axin to the membrane and stabilization of the central mediator  $\beta$ -catenin [30,31]. Phosphorylation of LRP6 at positions Ser1490, Thr1479 and Thr1493 is an important early activation step of the canonical Wnt pathway [32]. LRP6 phosphorylation at Ser1490 was measured in Muller glia MIO-M1 cells after Wnt3a addition in the presence or absence of 50 µg/ml LPS. Addition of Wnt3a lead to a 3.9-fold increase in phospho-LRP6 compared with control when tested after 1 hr, 2 hr and 4 hr, but not at 24 hr (Figure 5A–B, results for 1 hr are shown). However, LPS decreased phospho-LRP6 by approximately 50% (Figure 5A–B,  $p < 0.05$ ,  $n = 6$ ). Therefore, TLR4 activation by LPS interrupts Wnt signaling at an early point in the pathway.

The phosphorylation status of the Wnt pathway intermediate GSK3 $\beta$  at position Ser 9 was also examined. GSK3 $\beta$  is a critical inhibitor of the Wnt pathway that plays a central role in the “destruction complex” that maintains low levels of  $\beta$ -catenin [31]. Thus, decreased phosphorylation of GSK3 $\beta$  is often associated with enhanced Wnt pathway activation. Muller glia MIO-M1 cells treated with Wnt3a showed a small reduction in GSK3 $\beta$

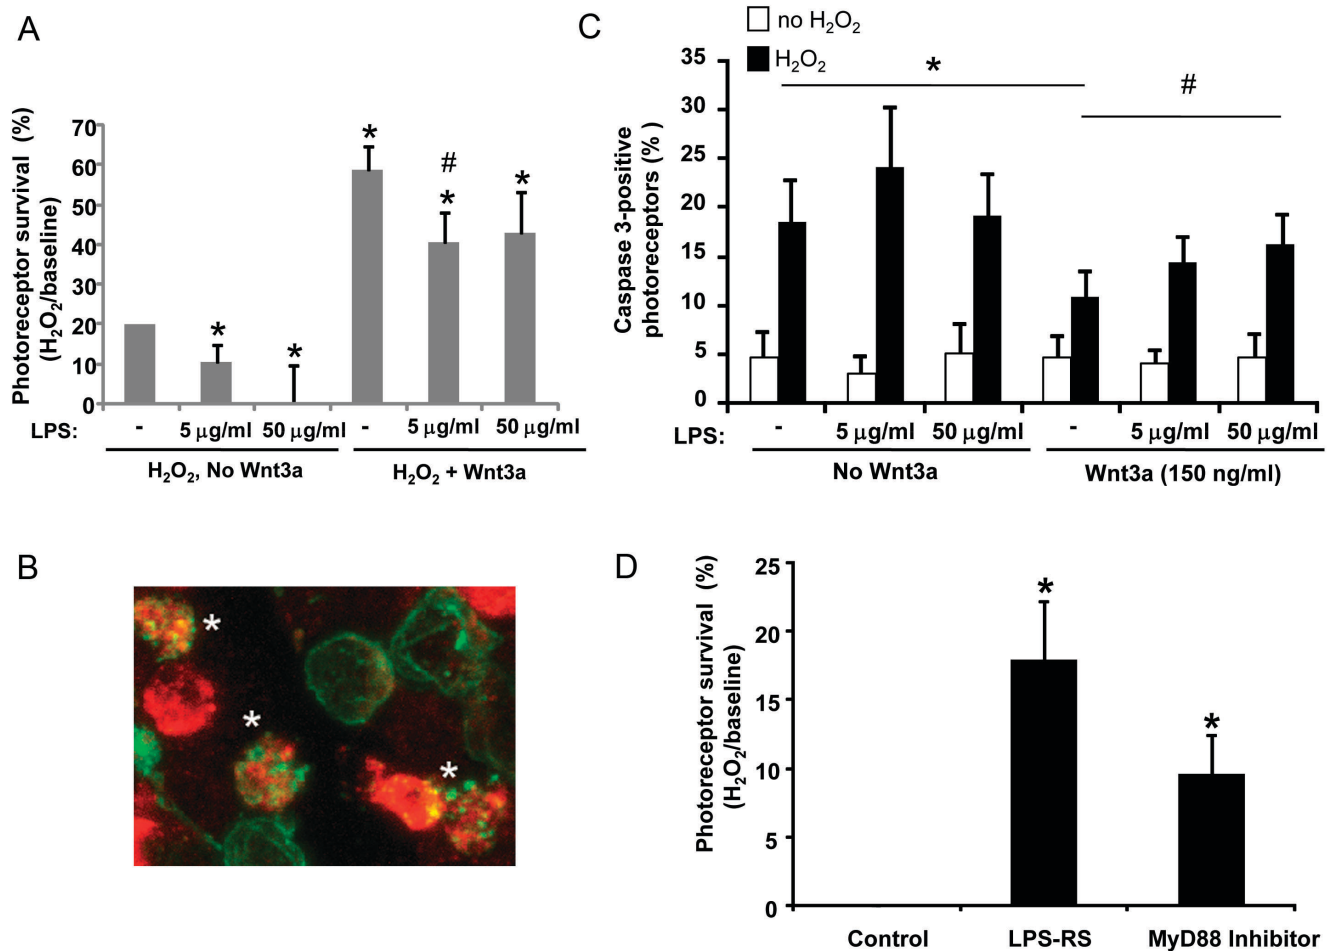

**Figure 3. The TLR4 activator LPS decreases photoreceptor viability and reduces Wnt-mediated protection from oxidative stress.** (A) Muller glia-photoreceptor cultures were incubated for 24 hr in 0.4 mM H<sub>2</sub>O<sub>2</sub> to induce oxidative stress, with and without recombinant Wnt3a (150 ng/ml) or the TLR4 activator LPS (5 and 50 μg/ml). Viability was measured by Cell Titer Blue. (A) LPS significantly reduced photoreceptor survival in the presence of H<sub>2</sub>O<sub>2</sub> whereas Wnt3a is protective (\**p*<0.05 vs H<sub>2</sub>O<sub>2</sub> alone). Furthermore, LPS reduced the protective effect of Wnt3a (#*p*<0.05 vs Wnt3a). Mean ± SEM, *n*=4. (B) Confirmation that LPS blocks Wnt3a rescue of photoreceptors. Active caspase 3 (red) marks rhodopsin-positive photoreceptors (green) photoreceptors dying from H<sub>2</sub>O<sub>2</sub>. \*, represents label overlap, indicating the proteins are detected in the same cell. Confocal microscopy, 63×, *n*=4. (C) Quantification of overlap indicates that Wnt3a reduced the number of caspase-positive photoreceptors and LPS decreased Wnt3a protection. LPS is not toxic in the absence of H<sub>2</sub>O<sub>2</sub>. White bars, no H<sub>2</sub>O<sub>2</sub>; black bars, with H<sub>2</sub>O<sub>2</sub>. Mean ± SD, \**p*<0.05 no additions with H<sub>2</sub>O<sub>2</sub> (*n*=5) compared with Wnt3a (*n*=4); #*p*<0.05 50 μg/ml LPS+Wnt3a (*n*=5) compared with Wnt3a+H<sub>2</sub>O<sub>2</sub> (*n*=4). (D) Retina cultures were incubated with LPS-RS (5 μg/ml) and the MyD88 inhibitor decoy peptide (0.5 μM) to block endogenous TLR4 activity, and cell viability in response to H<sub>2</sub>O<sub>2</sub> injury was measured as above. Viability was measured by Cell Titer Blue and was normalized to the respective controls (PBS for LPS-RS, control peptide for MyD88 inhibitor). The inhibitors significantly increased viability. Mean ± SD, \**p*<0.05, *n*=3. doi:10.1371/journal.pone.0036560.g003

phosphorylation on Ser 9 compared with control, which did not reach statistical significance (Figure 5C). Co-treating the cells with Wnt3a and LPS also did not result in significant changes in GSK3β phosphorylation when tested after 1 hr, 2 hr and 4 hr (results for 1 hr shown). Therefore, TLR4 activation is unlikely to suppress Wnt signaling by regulating GSK3β activity through Ser9 phosphorylation. The luciferase assays and LRP6 analysis together demonstrate that activation of TLR4 suppresses Wnt signaling in Muller glia cells.

### Preconditioning by TLR4 Protects Photoreceptors

Preconditioning occurs when exposure to low levels of an otherwise harmful stimulus protects against subsequent exposure to toxic levels of the same or different stimulus [15,16]. Importantly, preconditioning by one stimulus can often induce tolerance to other types of injury and preconditioning by LPS has

been demonstrated to protect against ischemia in the CNS and other tissues, raising the possibility that LPS-dependent preconditioning may protect photoreceptors against oxidative stress [33].

To test whether TLR4 activation by LPS induces a preconditioning response in the Muller glia-photoreceptor co-cultures, we stimulated TLR4 by adding LPS 2 hours prior to exposure to oxidative stress, and photoreceptor viability was measured after an additional 24 hours. There was significant protection from cell death observed with 0.5 and 5 μg/ml LPS compared with cultures that did not receive LPS (Figure 6A, *p*<0.05, *n*=4). Treatment with Wnt3a (150 ng/ml) also protected photoreceptors, as observed in Figure 3 and Yi et al. [17], and the combination of Wnt3a and LPS-induced preconditioning had greater protection than Wnt3a alone, suggesting an additive effect (Figure 6B, *p*<0.05, compared with Wnt3a, *n*=4). Therefore, in contrast to the damaging effect of TLR4 activation *during* injury (Figure 3),

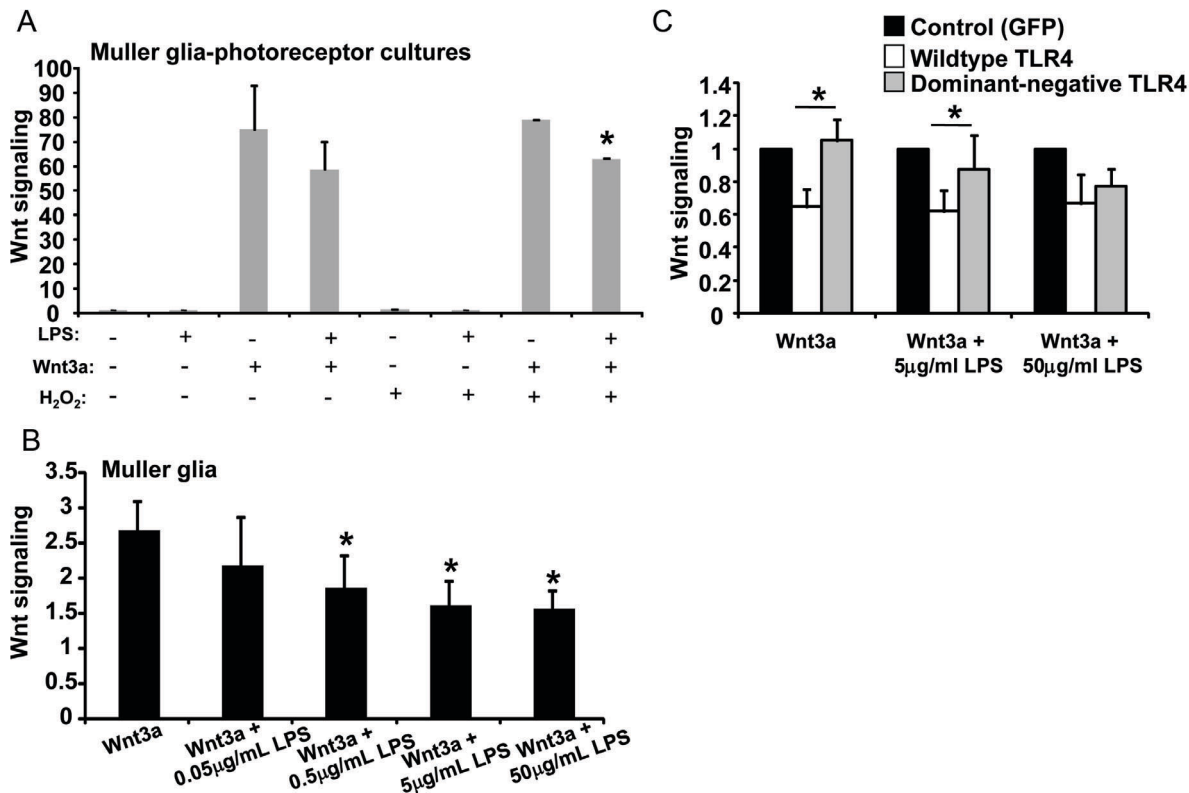

**Figure 4. Potential mechanism of photoreceptor death: TLR4 suppresses neuroprotective Wnt signaling.** The TLR4 activator LPS significantly decreased Wnt signaling in Muller glia-photoreceptor cultures (A) and the Muller glia cell line MIO-M1 (B–C), as measured by luciferase reporter assay. Normalization to cotransfected Renilla was used to account for the effect of LPS reducing cell number (\* $p < 0.01$ ,  $n = 4$ ). (C) Wnt signaling is suppressed by wild-type TLR4 (white bars) but not dominant-negative (grey bars) (\* $p < 0.05$ ,  $n = 5$ ). Luciferase activity was normalized to cotransfected Renilla luciferase, and is shown as the ratio of Wnt signaling in Wnt3a-treated cells to control-treated cells. Mean + SD is shown. doi:10.1371/journal.pone.0036560.g004

preconditioning by TLR4 activation by LPS *prior* to an injury resulted in increased photoreceptor viability. Indeed, the importance of the timing of LPS treatment relative to injury is shown using the 5.0  $\mu\text{g/ml}$  dose, which is toxic when LPS is cotreated with H<sub>2</sub>O<sub>2</sub> but is protective when added 2 hr before H<sub>2</sub>O<sub>2</sub>. LPS-induced tolerance is usually a lower dose than the toxic dose [16], which is also shown in our results because preconditioning was significant with 0.5  $\mu\text{g/ml}$  LPS whereas 5.0  $\mu\text{g/ml}$  was required for toxicity to photoreceptors.

To investigate the mechanism of preconditioning, we first examined expression of candidate mediators downstream of TLR4 activation to determine whether there was a correlation between expression changes and increased photoreceptor survival. TNF $\alpha$  expression was significantly increased in the LPS-treated cultures compared with untreated cultures (Figure 7A), consistent with it being a downstream target of LPS. The expression of TNF $\alpha$  receptors TNFR1 and TNFR2, which are also targets of LPS, showed a mild, but not statistically significant, increase in the LPS-treated cultures (Figure 7A). In contrast, in preconditioned cultures (LPS+ H<sub>2</sub>O<sub>2</sub>), expression of TNF $\alpha$  was 2.3 fold lower than LPS-treated retinal cultures in the absence of H<sub>2</sub>O<sub>2</sub> ( $p < 0.05$ ,  $n = 3$ ). Similarly, the receptors TNFR1 and TNFR2 were 2-fold and 1.7-fold lower in the preconditioned cultures, respectively, compared with LPS treatment alone. Therefore, these data suggest that decreased TNF $\alpha$  signaling is associated with photoreceptor preconditioning to H<sub>2</sub>O<sub>2</sub>.

We next investigated whether TNF $\alpha$  signaling plays a role in LPS-induced preconditioning. If preconditioning requires reduced

TNF $\alpha$  signaling, then suppressing the TNF $\alpha$  pathway further is expected to enhance the protective activity of LPS. First, an anti-TNF $\alpha$  blocking antibody was used to inhibit the activity of endogenous TNF $\alpha$ . As shown in Figure 7B, the viability of photoreceptors treated with a combination of anti-TNF $\alpha$  antibody and LPS was over 2-fold higher than LPS cotreated with the IgG control (Figure 7B,  $p < 0.05$ ,  $n = 6$ ). The anti-TNF $\alpha$  antibody alone showed photoreceptor protection, indicating that it was able to substitute for LPS. Additionally, the viability of photoreceptors was significantly increased by inhibitors of the TNFR1 and TNFR2 receptors (50 ng/ml) in the absence of LPS (Figure 7C,  $p < 0.05$ ,  $n = 6$ ). The protection by the combination of TNFR1 and TNFR2 inhibitors was equivalent to both added separately, indicating their protective effect was not additive. Treating the cultures with TNFR1 and TNFR1 inhibitors in combination with LPS did not enhance preconditioning more than LPS alone, suggesting a maximum level of protection was achieved by LPS (Figure 7C). The addition of recombinant TNF $\alpha$  (5 ng/ml) reduced photoreceptor viability to the level of the PBS control, which was reversed by TNFR1 and TNFR1 inhibitors ( $p < 0.05$ ,  $n = 6$ ), indicating their effectiveness.

Wnt signaling reporter assays were used to determine whether preconditioning is associated with Wnt signaling. Cultures treated with recombinant Wnt3a showed Wnt signaling induction, as expected (Figure 8A,  $p < 0.05$ ,  $n = 5$ ). However, Wnt signaling in LPS-induced preconditioned cultures (LPS+ H<sub>2</sub>O<sub>2</sub>) was not higher than H<sub>2</sub>O<sub>2</sub> alone, and the preconditioned cultures in the presence of Wnt3a (Wnt3a+ LPS+ H<sub>2</sub>O<sub>2</sub>) was also not significantly different

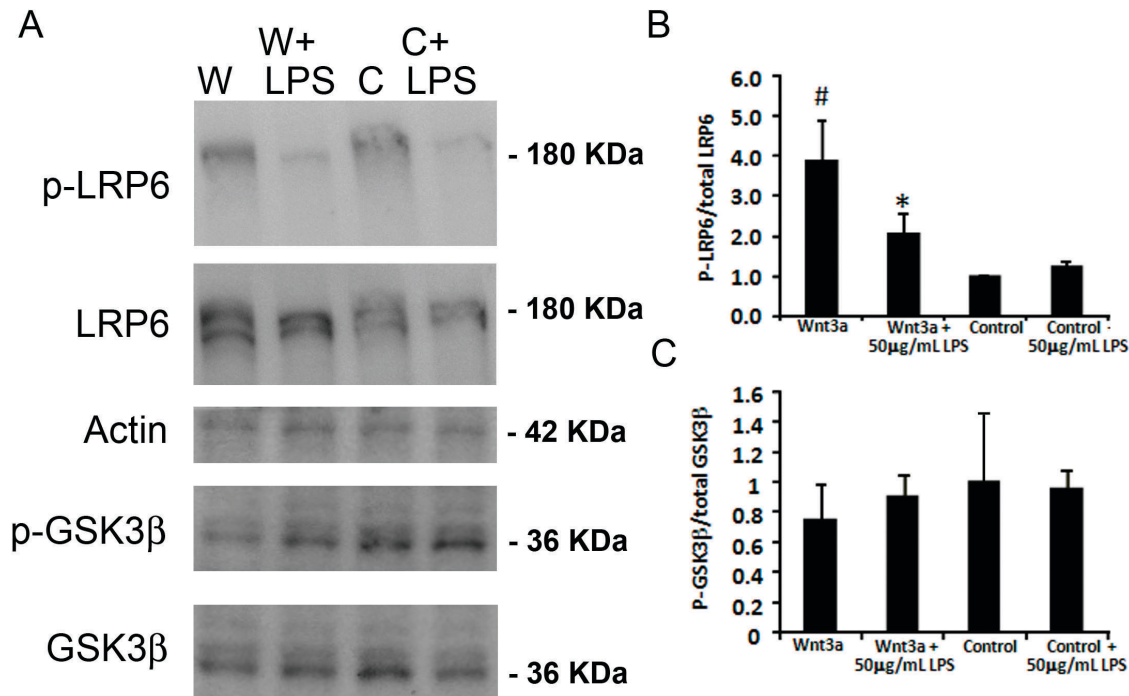

**Figure 5. TLR4 decreases Wnt signaling at the level of the LRP6 receptor activation in Muller glia MIO-M1 cells.** (A) Representative Western blots showing changes in phosphorylation status with Wnt signaling and LPS. Wnt3a conditioned media (W) increases the levels of phospho-Ser1490 LRP6 (p-LRP6) compared with control conditioned media (C). The addition of LPS reduces p-LRP6 in Wnt3a treated cultures. In contrast, the amount of phospho-Ser9 in GSK3β is not affected by LPS. (B–C) Quantification of phospho-LRP6 and phospho-GSK3β. Twenty micrograms of total protein were loaded in each lane. The phosphorylated proteins were detected by phospho-specific antibodies and normalized to β-actin as a labeled control, and total LRP6 and GSK3β proteins were detected by antibodies that recognize both their respective phospho- and unphosphorylated forms, and normalized to β-actin. #, Wnt3a compared with control  $p < 0.05$ ,  $n = 5$ ; \*, Wnt3a compared with Wnt3a+LPS  $p < 0.05$ ,  $n = 5$ . doi:10.1371/journal.pone.0036560.g005

than non-preconditioned cultures (Wnt3a+H<sub>2</sub>O<sub>2</sub>) (Figure 8A), despite Wnt3a+LPS+ H<sub>2</sub>O<sub>2</sub> having significantly greater viability than Wnt3a+ H<sub>2</sub>O<sub>2</sub> (Figure 6B). Therefore, LPS-induced protective preconditioning does not depend on Wnt3a-induced survival pathways. This result contrasts with LPS-induced toxicity, which was associated with suppressed Wnt signaling (see Figure 4).

To test whether inhibiting endogenous Wnt signaling would reduce LPS-induced preconditioning, the Muller glia-photoreceptor co-cultures were incubated with LPS combined with 200 ng/ml of the Wnt pathway inhibitor Dkk1, followed by exposure to H<sub>2</sub>O<sub>2</sub> to induce injury. As shown in Figure 8B, Dkk1 did not significantly change the viability of the cultures compared with LPS alone, confirming that preconditioning occurs without endogenous Wnt pathway activation. A proposed model describing the regulation of photoreceptor neuroprotection by cross-talk between TLR4 and Wnt signaling pathways, as derived from our experiments, is shown in Figure 8C.

#### TLR4 Distribution in a Mouse Model of Retinal Degeneration

We next analyzed the expression pattern of TLR4 in retinas with photoreceptor degeneration to determine whether TLR4 is expressed in photoreceptors and Muller glia in vivo. The C57Bl/6 mouse was used as a wild-type control, an antibody against rhodopsin was used to identify rod photoreceptors, and an antibody that detects vimentin was used to identify Muller glia. In the C57Bl/6 retina, there was prominent TLR4 immunostaining in rhodopsin-positive photoreceptors, which was localized in the region corresponding to photoreceptor inner segments (arrows

in Figure 9A). TLR4 immunodetection also overlapped with vimentin-positive cellular extensions, indicating TLR4 expression in Muller glia (Figure 9B). This expression pattern is consistent with our findings in the Muller glia-photoreceptor co-cultures (Figure 1). The specificity of the anti-TLR4 antibody was confirmed by lack of signal in TLR4 knock-out mice (Figure S2) and by lack of TLR4 immunodetection in the no primary antibody negative controls (Figure 9A–D). Signal overlap analysis is shown in Figure S3.

Next, the expression of TLR4 during photoreceptor death was analyzed using the C3H/HeOuj mouse model of retinal degeneration (also known as *rd1*). The *rd1* strain carries the retinal degeneration allele *Pde6b*<sup>rd1</sup> and the wild-type *TLR4* allele [28,34,35] and exhibits rapid rod photoreceptor death. The retinas were analyzed at post-natal day 14, which corresponds to the peak of rod photoreceptor death. The thickness of the outer nuclear layer and the number of rows of photoreceptor nuclei in the outer nuclear layer was reduced in the *rd1* retina due to death of the rod photoreceptors (Figure 9C–D). TLR4 was located in the photoreceptor inner segments in the *rd1* retina, similar to wild-type retina, and was also prominently detected in the Muller glia (Figure 9C–D). Furthermore, the distribution of TLR4 in the photoreceptor layer changed during retinal degeneration and it became detectable in the outer nuclear layer, where the photoreceptor soma and nuclei are located (Figure 9C, Figure S2B). The new localization of TLR4 is similar to rhodopsin, which also becomes localized to the ONL, and may be due to a general mislocalization of proteins that occurs when the photoreceptor outer segments degenerate. TLR4 was not located in the outer nuclear layer in the age-matched wild-type mouse retina

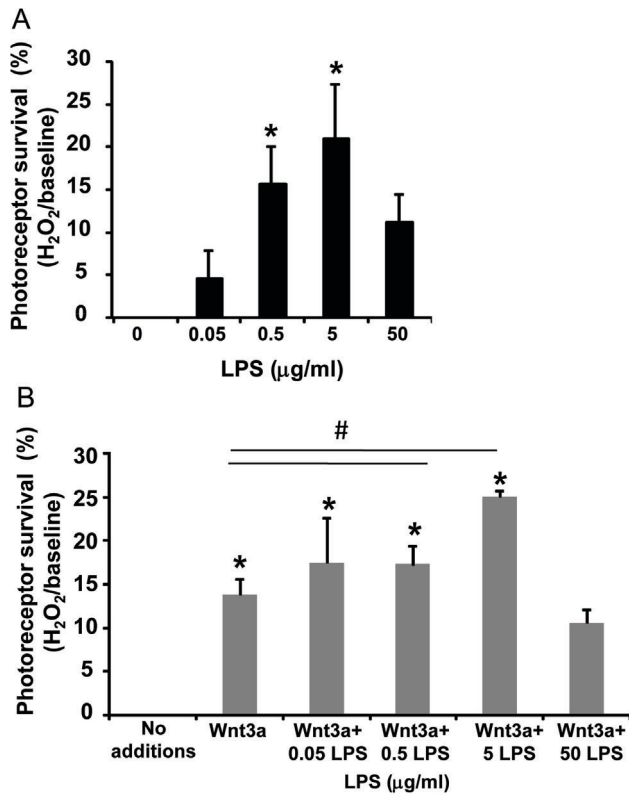

**Figure 6. Preconditioning by LPS-induced TLR4 activation protects photoreceptors from oxidative stress.** (A) Muller glia-photoreceptor cultures were incubated in LPS (0.05–50 μg/ml) two hrs before challenge with 0.4 mM H<sub>2</sub>O<sub>2</sub>. Significant protection was seen with 0.5 and 5 μg/ml LPS (\*p<0.05 vs no LPS). Mean ± SD, n=4. (B) Wnt3a (150 ng/ml) also protected photoreceptors (\*p<0.05 compared with no additions). The combination of Wnt3a and 0.5 and 5 μg/ml LPS preconditioning had greater protection than Wnt3a alone (#p<0.05 vs Wnt3a). Mean ± SD, n=4. The comparison between Wnt3a+5 μg/ml LPS vs Wnt3a+50 μg/ml LPS, Wnt3a+0.5 μg/ml LPS vs Wnt3a+5 μg/ml LPS, and Wnt3a+50 μg/ml LPS vs no additions, are also significant at p<0.05. Viability was measured by Cell Titer Blue. doi:10.1371/journal.pone.0036560.g006

(Figure 9A, Figure S2A). Therefore, TLR4 is localized to photoreceptors and Muller glia in wild-type and degenerating mouse retinas, similar to its localization in the primary co-cultures, suggesting that TLR4 is a potential candidate regulator of photoreceptor death *in vivo*.

## Discussion

In this study, we showed that activation of the innate immunity TLR4 receptor has a dual role in regulating photoreceptor survival. TLR4 activation in the presence of oxidative stress reduced photoreceptor survival, whereas stimulation of TLR4 prior to injury increased photoreceptor survival, in a phenomenon known as preconditioning. The mechanism of TLR4 toxicity involved suppression of Wnt-dependent photoreceptor rescue, whereas TLR4-dependent preconditioning involved suppression of TNFα activity. Therefore, TLR4 is an important regulator of photoreceptor viability in culture, and may be an important element in the pathogenesis of retinal diseases where inflammation is a factor.

Our results are consistent with previous findings showing a toxic role for TLR4 in the CNS [9,10,11,12,13,14]. Ko et al. (2011) also

found that TLR4 activation, in this case by subcutaneous injection of heat killed *M. tuberculosis*, induced oxidative damage to photoreceptor outer segments, which was associated with elevated photoreceptor death and increased TNFα expression [36]. In contrast, LPS increased viability of the photoreceptor cell line 661 W when coapplied with injury induced by the nitrous oxide donor SNP [37]. Studies using animal models indicated that excessive TLR4 signaling and induction of innate immunity pathways contribute to further tissue damage by promoting axonal damage and neuronal death from oxidative and ischemic injuries [9,11,12,13,14]. In CNS damage models, mice lacking TLR4 have smaller infarct sizes, lower TNFα, IL6 and NFκB, and better outcomes in neurological and behavioral assays [7,14]. Also, lack of TLR4 improved survival of retinal ganglion cells from axotomy-induced death [13]. Therefore, the majority of studies point to a pathologic activity of TLR4 in the brain and retina during neuronal injury.

Although LPS was used to activate TLR4 in this study, TLR4 in neurons and astrocytes is believed to be activated during CNS damage by DAMPs that are passively released from injured cells, such as hsp70 [38], hyaluronic acid [39] and high-mobility group protein box-1 (HMGB1) [40,41,42]. TLR4 activation leads to the release of TNFα, interleukin-1β, and other cytokines, which exacerbates the inflammatory response [43]. DAMPs also induce downstream pathways involved in regeneration [44] and neurite outgrowth [45], thereby stimulating tissue repair. Several endogenous TLR4 activators are upregulated during photoreceptor oxidative injury *in vivo*, such as HMGB1 [40,46], suggesting that they may be a source of TLR4 activation during retinal disease.

Regarding a mechanism of TLR4-mediated toxicity, our study is the first example of an innate immunity receptor regulating the neuroprotective Wnt signaling pathway in the CNS. Because Wnt signaling induces growth factors in Muller glia [47], a potential mechanism for TLR4-induced photoreceptor death is by TLR4 activation suppressing Wnt signaling, leading to reduced growth factor expression and secretion, and increased photoreceptor death in response to oxidative stress. However, other mechanisms of TLR4 mediated death may also be involved that are independent from reduced Wnt signaling, including a direct effect of TLR4 on MAPK, NFκB and Jak1/Stat1 signaling pathways [48,49]. TLR4 has also been shown to mediate neuronal toxicity through caspase 3, neuronal iNOS and phosphorylation of the stress kinases ERK1/2, JNK1/2 and p38 [13].

In support of our findings for an interaction between TLR4 and Wnt pathways, Sodhi et al. demonstrated that TLR4 activation decreased β-catenin levels in enterocytes in a mouse model of necrotizing enterocolitis (NEC) [22]. Whereas we found that TLR4 suppressed Wnt signaling in Muller glia by reducing phosphorylation and therefore activation of LRP6, TLR4 acted further downstream in enterocytes by increasing GSK3β activity via regulation of AKT [22]. Reduced Wnt signaling is believed to be a factor in impaired enterocyte proliferation in NEC, and inhibiting TLR4 restored Wnt signaling and rescued the enterocyte phenotype. Interestingly, TLR4 activation in different cell types in the intestine can lead to opposite effects on enterocyte proliferation, possibly due to cell-specific effects, age of the animal and extent and duration of inflammation [22]. Also, LPS reduced nuclear β-catenin levels and Wnt luciferase reporter activity in an osteoblast cell line [50]. However, in *Drosophila*, Toll/NFκB signaling upregulated the β-catenin-independent Wnt family member WntD [51], possibly indicating species-specific and context-dependent effects.

Innate immunity in the retina is typically mediated by the immune-regulator cells microglia and astrocytes, although TLR4



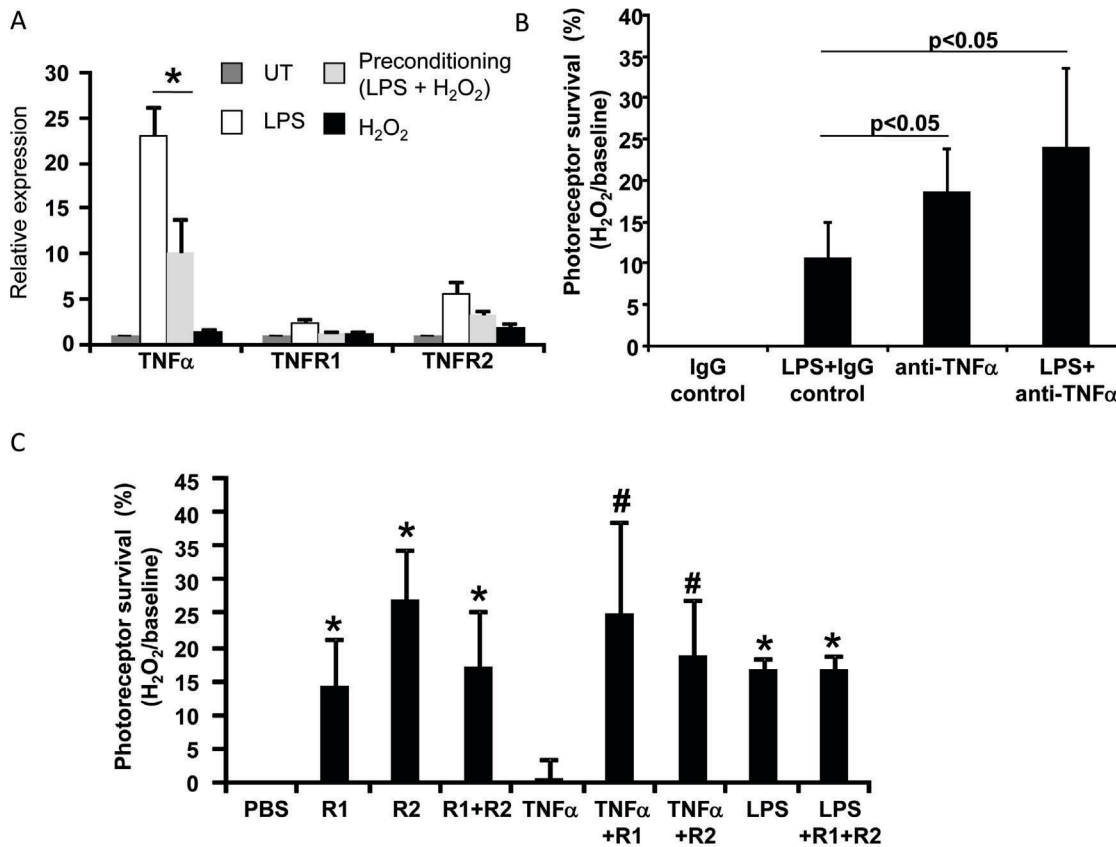

**Figure 7. LPS-induced preconditioning involves TNF $\alpha$  signaling.** (A) Primary Muller glia-photoreceptor cultures were treated with 5  $\mu$ g/ml LPS 2 hr prior to 0.4 mM H<sub>2</sub>O<sub>2</sub> and expression of TNF $\alpha$  and its receptors were analyzed by QPCR. The preconditioned cultures (LPS+H<sub>2</sub>O<sub>2</sub>) have lower expression of TNF $\alpha$  and the receptors TNFR1 and TNFR2 (mean  $\pm$  SEM, \* $p$ <0.05,  $n$ =4). (B) Muller glia-photoreceptor cultures were treated with 5  $\mu$ g/ml anti-TNF $\alpha$  blocking antibody, or the IgG control, with or without LPS, 2 hr prior to H<sub>2</sub>O<sub>2</sub> injury. Photoreceptor viability was measured and normalized to PBS treated cultures. The viability of photoreceptors treated with a combination of anti-TNF $\alpha$  antibody and LPS was over 2-fold higher than LPS cotreated with the IgG control ( $p$ <0.05,  $n$ =6). Anti-TNF $\alpha$  antibody alone also showed photoreceptor protection, indicating that it substitutes for LPS. Viability was measured by Cell Titer Blue. (C) Muller glia-photoreceptor co-cultures were treated with 50 ng/ml of the TNFR1 and TNFR2 receptor inhibitors, with or without LPS, 2 hr prior to H<sub>2</sub>O<sub>2</sub> injury. The TNFR1 and TNFR2 inhibitors protected the retina cultures, separately and in combination (\* $p$ <0.05,  $n$ =6). Treating the cultures with TNFR1 and R2 inhibitors in combination with LPS did not enhance preconditioning more than LPS alone, suggesting a maximum level of protection was achieved by LPS. The addition of recombinant TNF $\alpha$  (5 ng/ml) resulted in photoreceptor viability equivalent to PBS control, which was reversed by TNFR1 and R2 inhibitors (# $p$ <0.05,  $n$ =6), indicating their effectiveness. Viability was measured by Cell Titer Blue and was normalized to PBS treatments. doi:10.1371/journal.pone.0036560.g007

is also active on non-immune cells, including RPE, Muller glia and retinal neurons (the present study, [52,53]). Neurons throughout the CNS are able to regulate the immune response, enabling them to engage immune receptors in non-pathogen/stress response situations in order to maintain homeostasis and recover from injury. For example, in an ischemic stroke model, neurons were the first cell types to induce TLRs, followed by increased expression in the infiltrating microglia [7]. TLR4 localized in photoreceptors and Muller glia may permit a more direct and immediate response to genetic or environmental injury compared with activation in microglia, and may also engage different signaling pathways. TLR4 expression on photoreceptors has been demonstrated early in development [54] and by transcript analysis of laser microdissected photoreceptors [37]. TLRs, including TLR4, mediate RPE phagocytosis of photoreceptor outer segments [52]. TLR4 activation in microglia also contributes to photoreceptor survival, because Ko et al. found that TLR4 in microglia led to photoreceptor death after injection of heat killed *M. tuberculosis* [36]. Understanding how the TLR response in the different cells culminates in the overall retina response to injury

will be important for determining therapeutic application of TLR pathways.

Muller glia are the principle supportive glia in the retina that are stimulated in retinal degenerations as part of the intrinsic tissue response to injury [55,56]. Important insights into retinal diseases will be gained from understanding how the Muller glia-mediated inflammatory response in the retina is regulated by genetic injury and normal aging, and the role of endogenous regulator proteins in suppressing innate immunity and inflammation. Our findings also indicate that Muller glia may be cellular mediators of photoreceptor viability in response to TLR4, in addition to any possible direct effects of TLR4 activation on photoreceptor viability, which have yet to be determined. Activated Muller glia are believed to secrete growth factors that protect photoreceptors from further damage [57,58] [47,59]. Furthermore, Muller glia-microglia interactions may regulate the overall protection response [56], and Muller glia also suppress the immune system [60], which could be relevant to reducing further injury in the retina.

To our knowledge, our findings are the first to demonstrate LPS-induced photoreceptor preconditioning, raising the possi-

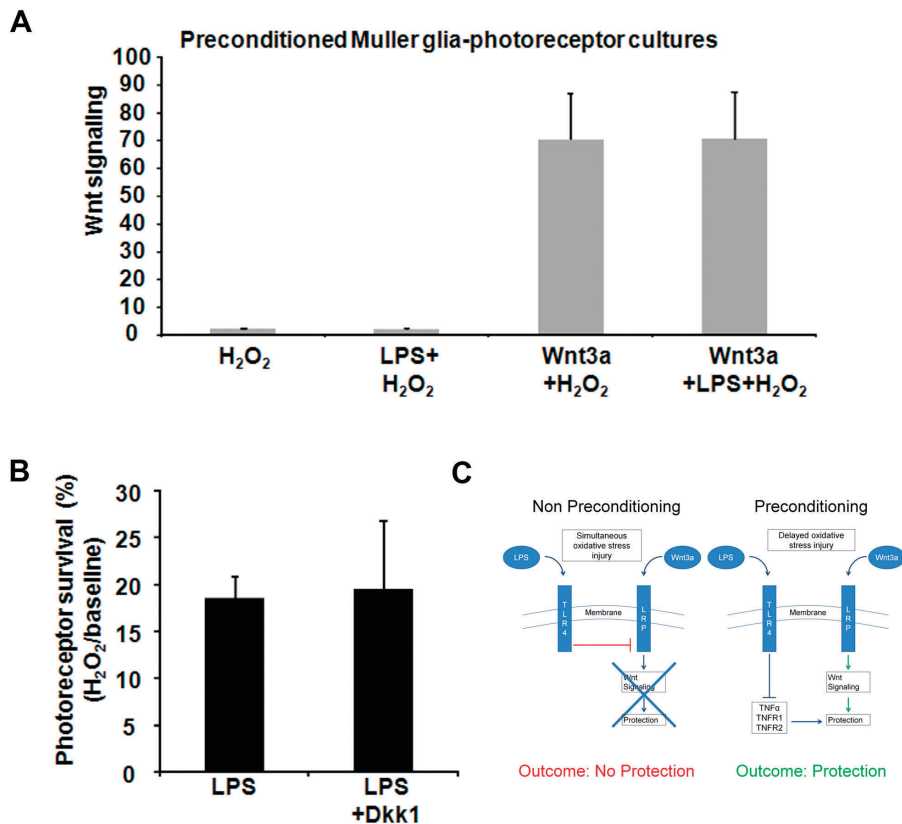

**Figure 8. Preconditioning by LPS does not require canonical Wnt signaling.** (A) Wnt signaling was measured in preconditioned Muller glia-photoreceptor cultures. The cultures were treated with LPS with or without Wnt3a, 2 hr prior to injury by H<sub>2</sub>O<sub>2</sub> (0.4 mM). Wnt signaling was measured using a luciferase reporter assay. Wnt3a increased Wnt signaling ( $p < 0.05$ ,  $n = 5$ , compared with H<sub>2</sub>O<sub>2</sub> only) but preconditioning with LPS did not induce Wnt signaling or change the level of Wnt3a-dependent Wnt signaling. Therefore, LPS-induced preconditioning is independent of the canonical Wnt pathway. (B) The Muller glia-photoreceptor cultures were incubated with LPS with or without the Wnt pathway inhibitor Dkk1 (200 ng/ml), followed by exposure to H<sub>2</sub>O<sub>2</sub>. The protection by LPS was not altered by Dkk1, indicating that endogenous Wnt pathway activation is not required. Mean  $\pm$  SD,  $n = 5$ , compared with PBS treated. Viability was measured by Cell Titer Blue. (C) Proposed model of regulation of photoreceptor neuroprotection by cross-talk between the TLR4 and Wnt signaling pathways. (Left) During oxidative stress injury, TLR4 signaling suppresses Wnt signaling at the level of LRP6 receptor activation, leading to reduced Wnt3a-mediated photoreceptor protection. (Right) In the presence of LPS preconditioning prior to oxidative stress, activation of TLR4 reduces TNF $\alpha$ , leading to increased neuroprotection. TLR4 does not regulate the Wnt signaling pathway during preconditioning. doi:10.1371/journal.pone.0036560.g008

bility that preconditioning by LPS may protect photoreceptors *in vivo*, as has been shown with preconditioning induced by bright light [61] and hypoxia/ischemia [62]. LPS injection also protected the inner retina (primarily retinal ganglion cells) from elevated pressure induced by ischemia-reperfusion injury, in an iNOS-dependent mechanism [15]. Although the physiological correlate of LPS-induced preconditioning is not yet known, it may indicate a role for TLR4 acting as a sensor of tissue injury by binding to molecules released from damaged cells, degradation of the extracellular matrix and changes in cellular redox state [1]. Injured neurons secrete TLR4 activating DAMP molecules that stimulate microglia and other cells, potentially Muller glia, and may induce neuroprotective cytokines and growth factors without engaging acute inflammation and neurotoxicity [63].

The mechanism of preconditioning by TLR4 activation is believed to be induction of a mild inflammatory response [15,64,65]. Our findings are consistent with this idea because TLR4 preconditioning in photoreceptor cultures involved lower TNF $\alpha$  levels than TLR4 activation in the absence of injury. Whether TNF $\alpha$  is acting directly on photoreceptors or indirectly through Muller glia remains to be established. TNF $\alpha$  plays dual

roles in the CNS and is a major mediator of neuroinflammation and toxicity yet can also confer neuroprotection, depending on the specific receptor and adapter proteins engaged [66]. Indeed, LPS-induced preconditioning in a rat model of stroke required upregulated TNF $\alpha$  and neuroprotective molecules [67–68]. However, TNF $\alpha$  in the retina is primarily neurotoxic. TNF $\alpha$  in the vitreous is elevated during retinal degeneration and TNF $\alpha$  blockers protect photoreceptors from degeneration in a retinal detachment model [69,70]. We also showed that preconditioning involved a distinct pathway from Wnt signaling-dependent protection. Similarly, Barandon et al. found that ischemic preconditioning in the mouse heart did not alter  $\beta$ -catenin levels [71]. However, Brandon et al did implicate GSK3 $\beta$  in preconditioning, suggesting that  $\beta$ -catenin independent/non-canonical Wnt signaling may be a factor in ischemia preconditioning protection in the heart [71]. Therefore, the involvement of non-canonical Wnt signaling in preconditioning in the retina is a possibility.

Our work suggests a model in which photoreceptor injury leads to activation of the innate immunity receptor TLR4, which increases photoreceptor death by inhibiting Wnt signaling in Muller glia. In contrast, TLR4-mediated preconditioning via

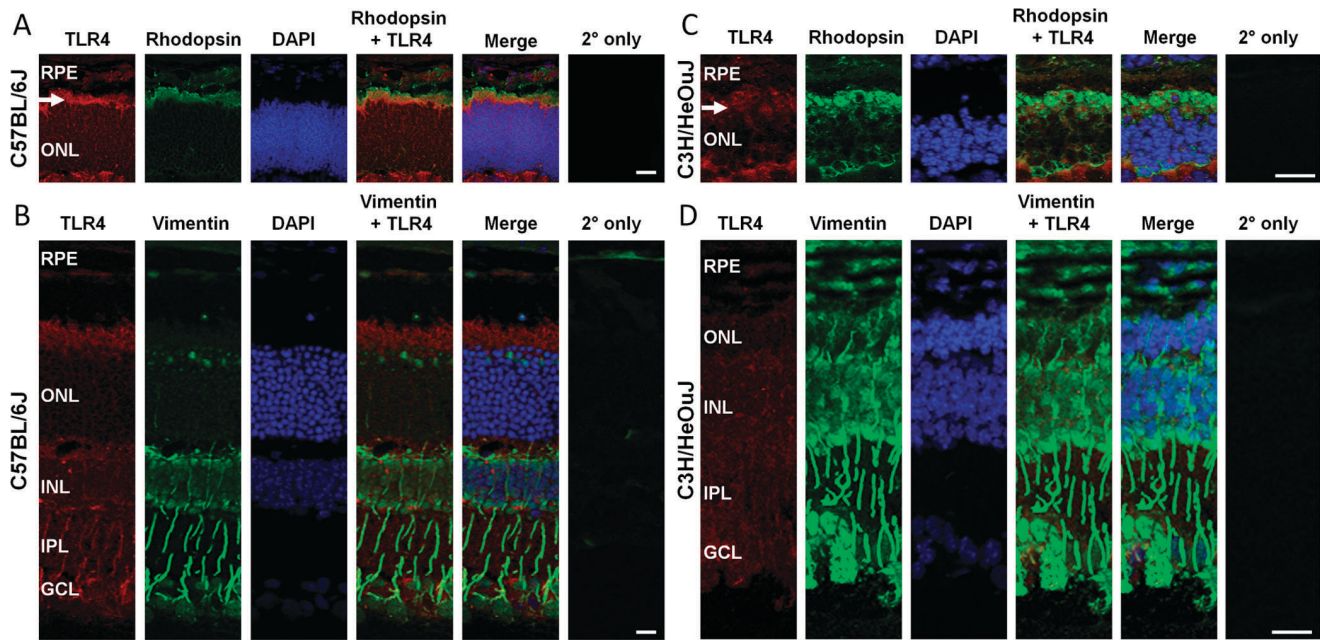

**Figure 9. Localization of TLR4 in photoreceptors and Muller glia by immunodetection of TLR4, rhodopsin and vimentin in wild-type (C57Bl/6) and degenerating (C3H/HeOuj) mouse retinas.** (A,C) Both strains of mice were analyzed at post-natal day 14, which corresponds to the peak of rod photoreceptor degeneration in C3H/HeOuj. TLR4 (red) is expressed in photoreceptors, shown by label overlap with rhodopsin (green, arrow) within the inner segments of C57 retinas, and in inner segments and outer nuclear layer (ONL) in C3H retinas. Sections stained with 2° antibody only (red, Alexa 546; green, Alexa 488) were used as controls for nonspecific staining. (B,D) TLR4 is expressed in Muller glia, as shown by label overlap of TLR4 (red) with the Muller glia protein vimentin (green). Expression of TLR4 within the Muller glia processes are clearly evident in the inner plexiform layer (IPL). Images in A–B are 10× magnification, and C–D are 20× magnification, using a Zeiss confocal microscope. DAPI was used to label the nuclei. RPE: Retinal pigmented epithelium, ONL: Outer nuclear layer, INL: Inner nuclear layer, IPL: Inner plexiform layer, GCL: Ganglion cell layer, Scale bar, A–C 25 μm, D 12 μm.  
doi:10.1371/journal.pone.0036560.g009

TNF $\alpha$  suppression, prior to oxidative stress injury, is a novel mechanism of neuroprotection for photoreceptors (Figure 8C). Recent studies have linked dysregulation of the innate immune system with several common diseases of the retina, including age related macular degeneration (AMD) [72,73] and glaucoma [74]. In AMD, dysfunctional RPE are believed to trigger an inflammatory response [75], but the specific contribution of innate immunity to photoreceptor death is unknown. TLR4 may be activated by signature molecules found in AMD retinas, including oxidized lipids, lipofuscin and components of protein deposits known as drusen [72,76]. Once activated, TLR4 could contribute to the pathogenesis of AMD by inducing neurotoxicity to photoreceptors, similar to its activity elsewhere in the CNS.

TLR4 attracted considerable attention and controversy recently because coding and non-coding polymorphisms in the *TLR4* gene were associated with AMD [77,78], although subsequent studies only confirmed a genetic association with non-coding SNPs and AMD [77]. Multiple TLRs are expressed in retina cell types involved in AMD, including RPE, macrophages, Muller glia, photoreceptors and endothelial cells [52,53] but the activity of TLR4 has not been examined during AMD or other photoreceptor disease. Our data in the retinal cultures suggest that TLR4 activity in Muller glia and/or photoreceptors may contribute to photoreceptor death in AMD. TLR4 may be stimulated in AMD eyes by chronic low-level injury that releases DAMPs, oxidized lipids or other tissue damage. Therefore, regulating TLR4 activity, or the expression of endogenous damage response molecules to prevent TLR4 activation, may be a potential therapeutic target for retinal diseases such as AMD.

## Materials and Methods

### Cell Culture and Reagents

All procedures involving mice were performed in accordance with the ARVO Statement for the Use of Animals in Ophthalmic and Vision Research and were approved by the Animal Care and Use Committee at the University of Miami, protocol number 10-078. The mouse lines used were C57Bl/6 and C3H/HeOuj (as known as *rd1*) from Jackson Laboratory (Bar Harbor, Maine) and TLR4 knock-out mice [79]. Primary Muller glia-photoreceptor co-cultures were prepared as described in [17]. Briefly, retinas from wild-type mice at post-natal day (P) 8 mice were dissociated in activated papain for 30 min at 37°C, mixed with Neurobasal medium containing 1× LoOvo plus DNase I (Invitrogen, Carlsbad, CA) and pelleted by low-speed centrifugation. The cell pellet was washed in neurobasal-LoOvo medium without DNase and plated in neurobasal medium containing L-glutamine, B27 and antibiotics onto poly-D-lysine/laminin coated 96-well dishes at a density of  $2.5 \times 10^3$  cells per well. Immunohistochemistry using antibodies recognizing cell-type specific marker proteins were used to confirm the purity of the cultures.

The human Muller glia cell line MIO-M1 was a gift from Dr. Astrid Limb [80] and the mouse microglia cell line BV2 [81] were generously provided by Dr. Venkata Kakulavarapu (University of Miami). Both cell lines were maintained in Dulbecco modified Eagle medium (DMEM) supplemented with 10% fetal bovine serum, 1% penicillin and streptomycin and 10 μg/ml L-glutamate. Recombinant Wnt3a and Dkk1 were obtained from R&D Systems (Manassas, VA), ultra-pure LPS *E. Coli* 0111:B4 and the TLR4 antagonist LPS-RS were from Invivogen (San

Diego, CA), recombinant TNF $\alpha$  and soluble TNF Receptor Type I and Type II molecules to block the receptors were from Peprotech (Rocky Hill, NJ). Wnt3a conditioned media was prepared from mouse L-cells stably expressing Wnt3a (ATCC, Manassas VA), filtered and mixed with equal parts normal media for use. The control conditioned media was prepared from parental L-cells. The antibodies used in this study are listed in Table 1.

### Photoreceptor Viability Assays

Muller glia-photoreceptor co-cultures in triplicate wells were treated with or without H<sub>2</sub>O<sub>2</sub> in the presence of PBS control, recombinant Wnt3a and/or LPS, for 24 hours. Viability was measured using the Cell Titer Blue reagent (Promega, Madison, WI), which was added for 1 hour at 37°C and was quantified using an ELISA plate reader. Average absorbance measured for media plus treatment was subtracted from each test sample. Each experiment was performed at least three times on different days. For the preconditioning studies, LPS was added 2 hours before the addition of H<sub>2</sub>O<sub>2</sub> and Wnt3a and viability was measured as above. The two hour time-point was chosen because it is within the range typically used in published preconditioning studies in neuronal cultures. In some experiments, recombinant inhibitory molecules (Wnt3a, Dkk1, TNF $\alpha$  and TNF Receptor Type I and Type II, see previous paragraph) were added in addition to, or instead of, LPS, 2 hours before H<sub>2</sub>O<sub>2</sub> treatment.

Caspase 3 activation was also used as a marker of cell death, using the anti-active caspase 3 antibody (Cell Signaling, Danvers, MA). The Muller glia-photoreceptor co-cultures were immunostained with anti-vimentin and anti-rhodopsin antibodies to identify caspase 3-positive cells, and counterstained with DAPI to label the nuclei. To determine the percentage of apoptotic cells per treatment, the total number of cells was counted, and apoptotic cells were quantified by counting green fluorescence caspase 3 staining that overlapped with vimentin or rhodopsin. The cultures were counted in a masked fashion.

**Table 1.** Antibodies used in the study.

| Protein              | Company          | Dilution               |
|----------------------|------------------|------------------------|
| TLR4                 | Abcam Inc        | 1:75 (IHC)             |
| TLR4                 | Santa Cruz       | 1:50 (IHC), 1:1000 (W) |
| Iba1                 | Wako Chemicals   | 1:100 (IHC)            |
| Active caspase 3     | Cell Signaling   | 1:200 (IHC)            |
| p65                  | Santa Cruz       | 1:50 (IHC)             |
| LRP6                 | Cell Signaling   | 1:1000 (W)             |
| p-LRP6               | Cell Signaling   | 1:1000 (W)             |
| GSK3 $\beta$         | Cell Signaling   | 1:1000 (W)             |
| p-GSK3 $\beta$       | Cell Signaling   | 1:1000 (W)             |
| Glutamine synthetase | Sigma            | 1:300 (IHC)            |
| TNF $\alpha$         | ThermoScientific | 1:100 (IHC)            |
| $\beta$ -actin       | sigma            | 1:5000 (W)             |
| Vimentin             | sigma            | 1:300 (IHC)            |
| rhodopsin            | Millipore        | 1:300 (IHC)            |

IHC, immunohistochemistry; W, Western blot.

doi:10.1371/journal.pone.0036560.t001

### Quantitative PCR

Total RNA was extracted from cell pellets using Trizol reagent (Invitrogen), according to the manufacturer's directions as previously described [82]. One microgram of RNA was treated with DNase (Ambion, Austin, TX) and cDNA was synthesized using Thermoscript (Invitrogen). QPCR was performed using the iCycler thermocycler (BioRad, Hercules, CA) with primers that were designed to be specific to the gene of interest and were separated by at least one intron within the gene. The primers were: *TNFR1*: sense: 5' TGAGTGGCCTCCCTTGCAGCCA 3', antisense 5' CGGGCCTCCACCGGGGATATC 3'; *TNFR2* sense 5' CCTCGGACACCGTGTGTGCG 3', antisense 5' AAGGCGCAGTACCTGCCAGC 3'; *TNF $\alpha$* : sense 5' TCTTCTCATTCTGCTTGTGG 3', antisense 5' CACTTGGTGGTTTGCTACGA 3'; *IL6*: sense 5' CCAATTTCCAATGCTCTCCT 3', antisense 5' ACCACAGT-GAGGAATGTCCA 3'. Each gene was amplified in triplicate per QPCR experiment, and each experiment was performed at least five times on independently prepared samples. Relative transcript levels of each gene were calculated using the delta-delta C<sub>t</sub> method using the house-keeping gene ARP, as described, [83]. Standard PCR was performed using *Taq* polymerase (New England Biosciences) for *TLR4* using the primers: *TLR4* sense 5' TTTATTTCAGAGCCGTTGGTG 3', antisense 5' CAGAG-GATTGTCCTCCATT 3'.

### Western Blotting

The human Muller glia cell line MIO-M1 was treated with Wnt3a conditioned media or control conditioned media in the presence or absence of 50  $\mu$ g/ml LPS. The cells were then harvested and lysed in buffer containing proteinase and phosphatase inhibitor cocktail (50 mM Tris, pH7.4, 150 mM NaCl, 1% NP40, 0.05% SDS). Twenty micrograms of total protein were resolved in 10% SDS-PAGE gels using Tris-glycine buffer and the proteins were then transferred onto polyvinylidene fluoride (PVDF) membranes and probed using the antibodies that detect total GSK3 $\beta$ , total LRP6, phospho-GSK3 $\beta$  at Ser9, phospho-LRP6 at Ser1490, and  $\beta$ -actin, followed by several washes, incubation with horseradish peroxidase (HRP)-conjugated secondary antibodies (Santa Cruz Biotechnology Inc, Santa Cruz CA), and incubation with enhanced chemiluminescence reagent (ECL-plus) (GE Amersham, Piscataway NJ). The proteins were detected with a Chemidoc imager (BioRad) and the bands were quantified using NIH Image J. The values were normalized to  $\beta$ -actin to correct for loading differences, and the relative phosphorylation status was expressed as phospho-GSK3 $\beta$ /total GSK3 $\beta$  and phospho-LRP6/total LRP6. The source of antibodies and dilutions are listed in Table 1.

An antigen blocking experiment was performed to confirm the specificity of the anti-TLR4 antibody. Briefly, 0.5 ml of antibody was preincubated with 100  $\mu$ g and 200  $\mu$ g of its peptide epitope (Santa Cruz Biotechnology Inc.) for 1 hr at room temperature. Identical fractions of MIO-M1 cell lysates were loaded into adjacent wells of an SDS-PAGE gel, transferred onto a PVDF membrane, and the membrane was cut into strips. The strips were incubated with anti-TLR4 antibody or the antibody-peptide mixes, washed, incubated in secondary antibody, and then assembled together for imaging, as described above.

### Wnt Signaling Activity Luciferase Assays

Primary Muller glia-photoreceptor co-cultures and cell lines were co-transfected with a 4:1 ratio of the TOP-FLASH luciferase reporter plasmid (a generous gift from Dr. R. Moon, HHMI, University of Washington) and a Renilla luciferase plasmid

(Promega) using a nucleofector electroporator (Lonza, Wakersville). Wnt signaling was induced by the addition of Wnt3a at 24 hr post-transfection. The cells were harvested after 24 hr into Reporter lysis buffer (Promega, Madison WI) [84], according to the manufacturer's directions. Luciferase activity was measured in a Lumistar Galaxy luminometer (BMG Labtech Inc, Cary NC) and normalized to Renilla activity. Wnt signaling activity is expressed as firefly luciferase units/Renilla luciferase units. The assays were performed in triplicate wells in at least four independent experiments.

### Immunohistochemistry

Eyes were rinsed in PBS, fixed in 4% paraformaldehyde, incubated in increasing sucrose concentrations (5%–20%) then embedded in OCT and flash-frozen, as described [84]. Sections were cut at 10  $\mu$ m thickness. Immunostaining of the Muller glia-photoreceptor co-cultures was performed on cultures plated onto glass chamber slides (Lab-Tek), as described in [17]. The retinas and retinal culture slides were blocked in non-immune serum from the species of the secondary antibody and incubated with primary antibody overnight at 4°C, washed in PBS, and then incubated with secondary antibody. The sections were counterstained with DAPI, mounted in a solution of glycerol/PBS and were viewed using a fluorescent microscope (Zeiss Axiovert 200), equipped with a 20 $\times$ /NA 0.70 (HC Plan-Apochromat; Leica) objective lens, or a confocal microscope (Leica TCS SP5, Leica Microsystems), equipped with a 63 $\times$ /NA 1.4 oil (Plan-Apochromat; Leica) objective lens. Image acquisition and analysis software was Axiovision LE (Carl Zeiss) using a cooled charge-coupled device camera or the Leica Application Suite (Leica), respectively. All sections were imaged at room temperature (20–22°C). Photographic and microscopic settings were kept constant for comparisons between antibody and control staining. The images were processed for publication using Photoshop (Adobe) with only minimal adjustment of brightness or contrast that was applied to the entire figure, including the positive and negative controls.

### Statistical Analysis

Student's *t*-test or two-way analysis of variance (ANOVA) were used for statistical analyses using GraphPad Prism. A *p*-value <0.05 was considered significant.

### References

- Miyake K (2007) Innate immune sensing of pathogens and danger signals by cell surface Toll-like receptors. *Semin Immunol* 19: 3–10.
- Takeda K, Akira S (2004) TLR signaling pathways. *Semin Immunol* 16: 3–9.
- Kaczorowski DJ, Mollen KP, Edmonds R, Billiar TR (2008) Early events in the recognition of danger signals after tissue injury. *J Leukoc Biol* 83: 546–552.
- Marsh BJ, Williams-Karnesky RL, Stenzel-Poore MP (2009) Toll-like receptor signaling in endogenous neuroprotection and stroke. *Neuroscience* 158: 1007–1020.
- Matzinger P (1994) Tolerance, danger, and the extended family. *Annu Rev Immunol* 12: 991–1045.
- Mollen KP, Anand RJ, Tsung A, Prince JM, Levy RM, et al. (2006) Emerging paradigm: toll-like receptor 4-sentinel for the detection of tissue damage. *Shock* 26: 430–437.
- Tang SC, Arumugam TV, Xu X, Cheng A, Mughal MR, et al. (2007) Pivotal role for neuronal Toll-like receptors in ischemic brain injury and functional deficits. *Proc Natl Acad Sci U S A* 104: 13798–13803.
- Walter S, Letiembre M, Liu Y, Heine H, Penke B, et al. (2007) Role of the toll-like receptor 4 in neuroinflammation in Alzheimer's disease. *Cell Physiol Biochem* 20: 947–956.
- Tang SC, Lathia JD, Selvaraj PK, Jo DG, Mughal MR, et al. (2008) Toll-like receptor-4 mediates neuronal apoptosis induced by amyloid beta-peptide and the membrane lipid peroxidation product 4-hydroxynonenal. *Exp Neurol* 213: 114–121.
- Okun E, Griffioen KJ, Lathia JD, Tang SC, Mattson MP, et al. (2009) Toll-like receptors in neurodegeneration. *Brain Res Rev* 59: 278–292.

### Supporting Information

**Figure S1 IL-6 expression analysis of wild-type and dominant-negative TLR4.** IL-6 values obtained by QPCR were normalized to the housekeeping gene ARP, and then to the GFP transfection control (\**p*<0.01, *n* = 4). Mean  $\pm$  SD is shown. White bars, wild-type TLR4, grey bars, dominant-negative TLR4. (TIF)

**Figure S2 Analysis of TLR4 expression in TLR4 knock-out (TLR4 KO) retinas.** Absence of TLR4 detection in Muller glia and photoreceptors indicates specificity of the anti-TLR4 antibody. Artifactual separation of the photoreceptor outersegments is denoted by  $\emptyset$ . Images are at 20 $\times$  magnification using a Zeiss confocal microscope. DAPI was used to label the nuclei. RPE: Retinal pigmented epithelium, ONL: Outer nuclear layer, INL: Inner nuclear layer, IPL: Inner plexiform layer, GCL: Ganglion cell layer. Scale bar, A–C 25  $\mu$ m, D 12  $\mu$ m. (TIF)

**Figure S3 Analysis of label overlap of TLR4 and rhodopsin and TLR4 and vimentin.** Confocal microscopy imaging software was used to identify regions of label overlap of TLR4 and the photoreceptor marker protein rhodopsin (A–D) and the Muller glia marker protein vimentin (E–H). The merged images (see also Fig. 9 for the images presented separately) were analyzed and regions of label overlap are indicated in white. Images are at 10 $\times$  magnification for A–C and 20 $\times$  for D, using a Zeiss confocal microscope. DAPI was used to label the nuclei. RPE: Retinal pigmented epithelium, ONL: Outer nuclear layer, INL: Inner nuclear layer, IPL: Inner plexiform layer, GCL: Ganglion cell layer, Scale bar, A–C 25  $\mu$ m, D 12  $\mu$ m. (TIF)

### Acknowledgments

We thank Drs. Rei Nakamura and Miryam Frago for helpful discussion.

### Author Contributions

Conceived and designed the experiments: ASH DJH. Performed the experiments: HY CPS AKP. Analyzed the data: HY ASH AKP. Contributed reagents/materials/analysis tools: DJH CPS. Wrote the paper: ASH DJH CPS.

- Hua F, Ma J, Ha T, Xia Y, Kelley J, et al. (2007) Activation of Toll-like receptor 4 signaling contributes to hippocampal neuronal death following global cerebral ischemia/reperfusion. *J Neuroimmunol* 190: 101–111.
- Lehnardt S, Massillon L, Follett P, Jensen FE, Ratan R, et al. (2003) Activation of innate immunity in the CNS triggers neurodegeneration through a Toll-like receptor 4-dependent pathway. *Proc Natl Acad Sci U S A* 100: 8514–8519.
- Kilic U, Kilic E, Matter CM, Bassetti CL, Hermann DM (2008) TLR-4 deficiency protects against focal cerebral ischemia and axotomy-induced neurodegeneration. *Neurobiol Dis* 31: 33–40.
- Caso JR, Pradillo JM, Hurtado O, Lorenzo P, Moro MA, et al. (2007) Toll-like receptor 4 is involved in brain damage and inflammation after experimental stroke. *Circulation* 115: 1599–1608.
- Franco PJ, Fernandez DC, Sande PH, Keller Sarmiento MI, Chianelli M, et al. (2008) Effect of bacterial lipopolysaccharide on ischemic damage in the rat retina. *Invest Ophthalmol Vis Sci* 49: 4604–4612.
- Rosenzweig HL, Lessov NS, Henshall DC, Minami M, Simon RP, et al. (2004) Endotoxin preconditioning prevents cellular inflammatory response during ischemic neuroprotection in mice. *Stroke* 35: 2576–2581.
- Yi H, Nakamura RE, Mohamed O, Dufort D, Hackam AS (2007) Characterization of Wnt signaling during photoreceptor degeneration. *Invest Ophthalmol Vis Sci* 48: 5733–5741.
- Lin S, Cheng M, Dailey W, Drenser K, Chintala S (2009) Norrin attenuates protease-mediated death of transformed retinal ganglion cells. *Mol Vis* 15: 26–37.
- Seitz R, Hackl S, Seibuchner T, Tamm ER, Ohlmann A (2010) Norrin mediates neuroprotective effects on retinal ganglion cells via activation of the Wnt/beta-

- catenin signaling pathway and the induction of neuroprotective growth factors in Muller cells. *J Neurosci* 30: 5998–6010.
20. Fragoso MA, Yi H, Nakamura RE, Hackam AS (2011) The Wnt signaling pathway protects retinal ganglion cell 5 (RGC-5) cells from elevated pressure. *Cell Mol Neurobiol* 31: 163–173.
  21. Mizukami M, Souchevlytskyi N, Kiuchi Y, Kanamoto T (2009) Wnt14 inhibits death of retinal precursor cells. *Exp Eye Res* 89: 462–468.
  22. Sodhi CP, Shi XH, Richardson WM, Grant ZS, Shapiro RA, et al. (2010) Toll-like receptor-4 inhibits enterocyte proliferation via impaired beta-catenin signaling in necrotizing enterocolitis. *Gastroenterology* 138: 185–196.
  23. Cario E, Rosenberg IM, Brandwein SL, Beck PL, Reinecker HC, et al. (2000) Lipopolysaccharide activates distinct signaling pathways in intestinal epithelial cell lines expressing Toll-like receptors. *J Immunol* 164: 966–972.
  24. Xin Y, Fong YT, Wolf G, Wolf D, Cao W (2001) Protective effect of XY99–5038 on hydrogen peroxide induced cell death in cultured retinal neurons. *Life Sci* 69: 289–299.
  25. Seigel GM, Chiu L, Paxhia A (2000) Inhibition of neuroretinal cell death by insulin-like growth factor-1 and its analogs. *Mol Vis* 6: 157–163.
  26. Shen JK, Dong A, Hackett SF, Bell WR, Green WR, et al. (2007) Oxidative damage in age-related macular degeneration. *Histol Histopathol* 22: 1301–1308.
  27. Coats SR, Pham TT, Bainbridge BW, Reife RA, Darveau RP (2005) MD-2 mediates the ability of tetra-acylated and penta-acylated lipopolysaccharides to antagonize *Escherichia coli* lipopolysaccharide at the TLR4 signaling complex. *J Immunol* 175: 4490–4498.
  28. Poltorak A, He X, Smirnova I, Liu MY, Van Huffel C, et al. (1998) Defective LPS signaling in C3H/HeJ and C57BL/10ScCr mice: mutations in Tlr4 gene. *Science* 282: 2085–2088.
  29. Gribar SC, Sodhi CP, Richardson WM, Anand RJ, Gittes GK, et al. (2009) Reciprocal expression and signaling of TLR4 and TLR9 in the pathogenesis and treatment of necrotizing enterocolitis. *J Immunol* 182: 636–646.
  30. Logan CY, Nusse R (2004) The Wnt signaling pathway in development and disease. *Annu Rev Cell Dev Biol* 20: 781–810.
  31. Moon RT, Kohn AD, De Ferrari GV, Kaykas A (2004) WNT and beta-catenin signalling: diseases and therapies. *Nat Rev Genet* 5: 691–701.
  32. Niehrs C, Shen J (2010) Regulation of Lrp6 phosphorylation. *Cell Mol Life Sci* 67: 2551–2562.
  33. Marsh B, Stevens SL, Packard AE, Gopalan B, Hunter B, et al. (2009) Systemic lipopolysaccharide protects the brain from ischemic injury by reprogramming the response of the brain to stroke: a critical role for IRF3. *J Neurosci* 29: 9839–9849.
  34. Watson J, Riblet R, Taylor BA (1977) The response of recombinant inbred strains of mice to bacterial lipopolysaccharides. *J Immunol* 118: 2088–2093.
  35. Bowes C, Li T, Danciger M, Baxter LC, Applebury ML, et al. (1990) Retinal degeneration in the rd mouse is caused by a defect in the beta subunit of rod cGMP-phosphodiesterase. *Nature* 347: 677–680.
  36. Ko MK, Saraswathy S, Parikh JG, Rao NA (2011) The Role of TLR4 Activation in Photoreceptor Mitochondrial Oxidative Stress. *Invest Ophthalmol Vis Sci* 52: 5824–5835.
  37. Tu Z, Portillo JA, Howell S, Bu H, Subauste CS, et al. (2010) Photoreceptor cells constitutively express functional TLR4. *J Neuroimmunol* 230: 183–187.
  38. Vabulas RM, Ahmad-Nejad P, Ghose S, Kirschning CJ, Issels RD, et al. (2002) HSP70 as endogenous stimulus of the Toll/interleukin-1 receptor signal pathway. *J Biol Chem* 277: 15107–15112.
  39. Jiang D, Liang J, Fan J, Yu S, Chen S, et al. (2005) Regulation of lung injury and repair by Toll-like receptors and hyaluronan. *Nat Med* 11: 1173–1179.
  40. Barile GR, Schmidt AM (2007) RAGE and its ligands in retinal disease. *Curr Mol Med* 7: 758–765.
  41. Lotze MT, Tracey KJ (2005) High-mobility group box 1 protein (HMGB1): nuclear weapon in the immune arsenal. *Nat Rev Immunol* 5: 331–342.
  42. Qiu J, Xu J, Zheng Y, Wei Y, Zhu X, et al. (2010) High-mobility group box 1 promotes metalloproteinase-9 upregulation through Toll-like receptor 4 after cerebral ischemia. *Stroke* 41: 2077–2082.
  43. Faraco G, Fossati S, Bianchi ME, Patrone M, Pedrazzi M, et al. (2007) High mobility group box 1 protein is released by neural cells upon different stresses and worsens ischemic neurodegeneration in vitro and in vivo. *J Neurochem* 103: 590–603.
  44. Limana F, Germani A, Zacheo A, Kajstura J, Di Carlo A, et al. (2005) Exogenous high-mobility group box 1 protein induces myocardial regeneration after infarction via enhanced cardiac C-kit+ cell proliferation and differentiation. *Circ Res* 97: e73–83.
  45. Merenmies J, Pihlaskari R, Laitinen J, Wartiovaara J, Rauvala H (1991) 30-kDa heparin-binding protein of brain (amphoterin) involved in neurite outgrowth. Amino acid sequence and localization in the filopodia of the advancing plasma membrane. *J Biol Chem* 266: 16722–16729.
  46. Arimura N, Ki-i Y, Hashiguchi T, Kawahara K, Biswas KK, et al. (2009) Intraocular expression and release of high-mobility group box 1 protein in retinal detachment. *Lab Invest* 89: 278–289.
  47. Yi H, Hu J, Qian J, Hackam AS (2012) Expression of brain-derived neurotrophic factor is regulated by the Wnt signaling pathway. *Neuroreport* Vol 23: 189–194.
  48. Gorina R, Font-Nieves M, Marquez-Kisinousky L, Santalucia T, Planas AM (2011) Astrocyte TLR4 activation induces a proinflammatory environment through the interplay between MyD88-dependent NFkappaB signaling, MAPK, and Jak1/Stat1 pathways. *Glia* 59: 242–255.
  49. Kacimi R, Giffard RG, Yenari MA (2011) Endotoxin-activated microglia injure brain derived endothelial cells via NF-kappaB, JAK-STAT and JNK stress kinase pathways. *J Inflamm (Lond)* 8: 7.
  50. Xing Q, Ye Q, Fan M, Zhou Y, Xu Q, et al. (2010) *Porphyromonas gingivalis* lipopolysaccharide inhibits the osteoblastic differentiation of preosteoblasts by activating Notch1 signaling. *J Cell Physiol* 225: 106–114.
  51. Gordon MD, Dionne MS, Schneider DS, Nusse R (2005) WntD is a feedback inhibitor of Dorsal/NF-kappaB in *Drosophila* development and immunity. *Nature* 437: 746–749.
  52. Kindzelskii AL, Elnor VM, Elnor SG, Yang D, Hughes BA, et al. (2004) Toll-like receptor 4 (TLR4) of retinal pigment epithelial cells participates in transmembrane signaling in response to photoreceptor outer segments. *J Gen Physiol* 124: 139–149.
  53. de Kozak Y, Naud MC, Bellot J, Faure JP, Hicks D (1994) Differential tumor necrosis factor expression by resident retinal cells from experimental uveitis-susceptible and -resistant rat strains. *J Neuroimmunol* 55: 1–9.
  54. Shechter R, Ronen A, Rolls A, London A, Bakalash S, et al. (2008) Toll-like receptor 4 restricts retinal progenitor cell proliferation. *J Cell Biol* 183: 393–400.
  55. Chaum E (2003) Retinal neuroprotection by growth factors: a mechanistic perspective. *J Cell Biochem* 88: 57–75.
  56. Harada T, Harada C, Nakayama N, Okuyama S, Yoshida K, et al. (2000) Modification of glial-neuronal cell interactions prevents photoreceptor apoptosis during light-induced retinal degeneration. *Neuron* 26: 533–541.
  57. Harada T, Harada C, Koshika S, Wada E, Yoshida K, et al. (2002) Microglia-Muller glia cell interactions control neurotrophic factor production during light-induced retinal degeneration. *J Neurosci* 22: 9228–9236.
  58. Wenzel A, Grimm C, Samardzija M, Reme CE (2005) Molecular mechanisms of light-induced photoreceptor apoptosis and neuroprotection for retinal degeneration. *Prog Retin Eye Res* 24: 275–306.
  59. Gauthier R, Joly S, Pernet V, Lachapelle P, Di Polo A (2005) Brain-derived neurotrophic factor gene delivery to muller glia preserves structure and function of light-damaged photoreceptors. *Invest Ophthalmol Vis Sci* 46: 3383–3392.
  60. Caspi RR, Roberge FG (1989) Glial cells as suppressor cells: characterization of the inhibitory function. *J Autoimmun* 2: 709–722.
  61. Liu C, Peng M, Laties AM, Wen R (1998) Preconditioning with bright light evokes a protective response against light damage in the rat retina. *J Neurosci* 18: 1337–1344.
  62. Zhang C, Rosenbaum DM, Shaikh AR, Li Q, Rosenbaum PS, et al. (2002) Ischemic preconditioning attenuates apoptotic cell death in the rat retina. *Invest Ophthalmol Vis Sci* 43: 3059–3066.
  63. Minghetti L (2005) Role of inflammation in neurodegenerative diseases. *Curr Opin Neurol* 18: 315–321.
  64. Ha T, Hua F, Liu X, Ma J, McMullen JR, et al. (2008) Lipopolysaccharide-induced myocardial protection against ischaemia/reperfusion injury is mediated through a PI3K/Akt-dependent mechanism. *Cardiovasc Res* 78: 546–553.
  65. Marsh BJ, Stevens SL, Hunter B, Stenzel-Poore MP (2009) Inflammation and the emerging role of the toll-like receptor system in acute brain ischemia. *Stroke* 40: S34–37.
  66. Fontaine V, Mohand-Said S, Hanoteau N, Fuchs C, Pfizenmaier K, et al. (2002) Neurodegenerative and neuroprotective effects of tumor Necrosis factor (TNF) in retinal ischemia: opposite roles of TNF receptor 1 and TNF receptor 2. *J Neurosci* 22: RC216.
  67. Rosenzweig HL, Minami M, Lesov NS, Coste SC, Stevens SL, et al. (2007) Endotoxin preconditioning protects against the cytotoxic effects of TNFalpha after stroke: a novel role for TNFalpha in LPS-ischemic tolerance. *J Cereb Blood Flow Metab* 27: 1663–1674.
  68. Leung PY, Packard AE, Stenzel-Poore MP (2009) It's all in the family: multiple Toll-like receptors offer promise as novel therapeutic targets for stroke neuroprotection. *Future Neurol* 4: 201–208.
  69. El-Ghrably IA, Dua HS, Orr GM, Fischer D, Tighe PJ (1999) Detection of cytokine mRNA production in infiltrating cells in proliferative vitreoretinopathy using reverse transcription polymerase chain reaction. *Br J Ophthalmol* 83: 1296–1299.
  70. Nakazawa T, Kayama M, Ryu M, Kunikata H, Watanabe R, et al. (2011) Tumor necrosis factor-alpha mediates photoreceptor death in a rodent model of retinal detachment. *Invest Ophthalmol Vis Sci* 52: 1384–1391.
  71. Barandon L, Dufourcq P, Costet P, Moreau C, Allieres C, et al. (2005) Involvement of FrzA/sFRP-1 and the Wnt/frizzled pathway in ischemic preconditioning. *Circ Res* 96: 1299–1306.
  72. Kaarniranta K, Salminen A (2009) Age-related macular degeneration: activation of innate immunity system via pattern recognition receptors. *J Mol Med* 87: 117–123.
  73. Scholl HP, Charbel Issa P, Walier M, Janzer S, Pollok-Kopp B, et al. (2008) Systemic complement activation in age-related macular degeneration. *PLoS One* 3: e2593.
  74. Tezel G (2010) The immune response in glaucoma: A perspective on the roles of oxidative stress. *Exp Eye Res*.
  75. Hageman GS, Luthert PJ, Victor Chong NH, Johnson LV, Anderson DH, et al. (2001) An integrated hypothesis that considers drusen as biomarkers of immune-mediated processes at the RPE-Bruch's membrane interface in aging and age-related macular degeneration. *Prog Retin Eye Res* 20: 705–732.
  76. Higgins GT, Wang JH, Dockery P, Cleary PE, Redmond HP (2003) Induction of angiogenic cytokine expression in cultured RPE by ingestion of oxidized photoreceptor outer segments. *Invest Ophthalmol Vis Sci* 44: 1775–1782.

77. Edwards AO, Chen D, Fridley BL, James KM, Wu Y, et al. (2008) Toll-like receptor polymorphisms and age-related macular degeneration. *Invest Ophthalmol Vis Sci* 49: 1652–1659.
78. Zarepari S, Buraczynska M, Branham KE, Shah S, Eng D, et al. (2005) Toll-like receptor 4 variant D299G is associated with susceptibility to age-related macular degeneration. *Hum Mol Genet* 14: 1449–1455.
79. Hoshino K, Takeuchi O, Kawai T, Sanjo H, Ogawa T, et al. (1999) Cutting edge: Toll-like receptor 4 (TLR4)-deficient mice are hyporesponsive to lipopolysaccharide: evidence for TLR4 as the Lps gene product. *J Immunol* 162: 3749–3752.
80. Limb GA, Salt TE, Munro PM, Moss SE, Khaw PT (2002) In vitro characterization of a spontaneously immortalized human Muller cell line (MIO-M1). *Invest Ophthalmol Vis Sci* 43: 864–869.
81. Bocchini V, Mazzolla R, Barluzzi R, Blasi E, Sica P, et al. (1992) An immortalized cell line expresses properties of activated microglial cells. *J Neurosci Res* 31: 616–621.
82. Hackam AS, Strom R, Liu D, Qian J, Wang C, et al. (2004) Identification of gene expression changes associated with the progression of retinal degeneration in the rd1 mouse. *Invest Ophthalmol Vis Sci* 45: 2929–2942.
83. Silva AK, Yi H, Hayes SH, Seigel GM, Hackam AS (2010) Lithium chloride regulates the proliferation of stem-like cells in retinoblastoma cell lines: a potential role for the canonical Wnt signaling pathway. *Mol Vis* 16: 36–45.
84. Tell S, Yi H, Jockovich ME, Murray TG, Hackam AS (2006) The Wnt signaling pathway has tumor suppressor properties in retinoblastoma. *Biochem Biophys Res Commun* 349: 261–269.
